# Supplementary material
Source: PubMed Central journal article supplement (PMC5885845)
Supplement: jama-319-1209-s001.pdf [file jama-319-1209-s001.pdf]

## Supplementary Online Content

Cogswell ME, Loria CM, Terry AL, et al. Estimated 24-hour urinary sodium and potassium excretion in US adults. *JAMA*. doi:10.1001/jama.2018.1156

### **eMethods.**

**eTable 1.** Participation Status and 24-Hour Urine Values by Specimen, NHANES 2014

**eTable 2.** 24-Hour Urine Collection Completion Rates by Participant Characteristics, NHANES 2014

**eTable 3.** Weighted Characteristics and Urine Values by Number of Completed 24-Hour Urine Specimens

**eTable 4.** Within- to Between-Individual Variance in 24-Hour Urinary Electrolyte or Creatinine Excretion

**eTable 5.** Within-Individual Difference in 24-Hour Urinary Sodium Excretion

**eTable 6.** *P* Value Comparing Weighted Mean 24-Hour Urinary Sodium Excretion by Group

**eTable 7.** Unweighted Mean and Percentiles of 24-Hour Urinary Sodium Excretion, NHANES 2014

**eTable 8.** Weighted Proportion of Adults With 24-Hour Urinary Sodium Excretion  $\geq 2300$  mg, NHANES 2014

**eTable 9.** *P* Value Comparing Weighted Mean 24-Hour Urinary Potassium Excretion by Group

**eTable 10.** Unweighted Mean and Percentiles of 24-Hour Urinary Potassium Excretion, NHANES 2014

**eTable 11.** Weighted Mean and Percentiles, Ratio of 24-Hour Urinary Sodium-to-Potassium Excretion, US Adults, 2014

**eTable 12.** *P* Value Comparing Weighted Mean Ratio of 24-Hour Urinary Sodium-to-Potassium Excretion by Group

**eTable 13.** Weighted Proportion of Adults With  $>70\%$  of Expected 24-Hour Urinary Creatinine Excretion

**eTable 14.** Weighted Mean Urinary Electrolyte Excretion, Adults With  $>70\%$  of Expected Creatinine Excretion

**eTable 15.** Weighted Mean 24-Hour Urinary Electrolyte Excretion With and Without Multiple Imputation

**eTable 16.** Weighted Mean 24-Hour Urinary Electrolyte Excretion by Hypertension Status, US Adults, 2014

**eTable 17.** Weighted Mean Dietary Sodium, Energy, and Sodium Density, NHANES 2013-2014

**eFigure 1.** Weighted Mean 24-Hour Urinary Sodium Excretion by Age Group, NHANES 2014

**eFigure 2.** Weighted Mean 24-Hour Urinary Sodium Excretion by Age Group and Sex, NHANES 2014

**eFigure Legends.**

**eReferences**

This supplementary material has been provided by the authors to give readers additional information about their work.

## *eMethods.*

### *24-Hour Urine Collection Methods*

The protocol for 24-hour urine collection is available elsewhere.<sup>1</sup> Briefly, during the examination in the Mobile Exam Center (MEC), randomly selected National Health and Nutrition Examination Survey (NHANES) participants were asked to participate in a 24-hour urine collection, post examination.<sup>1</sup> Those who agreed were scheduled for two visits to the Urine MEC (UMEC). During the first visit, they started their urine collection. During the second visit, they returned their kits and finished their collection. Participants were randomly assigned to start collection on a weekend or weekday, but if unable to comply, were allowed to schedule urine collection at their convenience.

At the first appointment in the UMEC, study staff gave a 24-hour urine collection kit to the participant. The kit contained urine collection equipment and written instructions on how to collect and return the 24-hour urine specimen. Study staff opened the kit, explained the contents, provided oral instructions to the participant and gave them the written instructions.<sup>1</sup>

To start collection, study staff asked the participant to empty their bladder in the bathroom in the UMEC. Drinking water was provided if needed, to help individuals void. The time of the void was recorded and checked by UMEC staff. This initial void was discarded and the participant asked to collect all urine from that moment for a period of 24-hours ending with the last specimen collection in the UMEC the next day with the time again checked by UMEC staff. If a participant could not come back the next day (~24-hours after the start time), they were required to schedule a time within 48 hours of the start to return their urine specimen to the UMEC. For participants who could not start or stop 24-hour urine collection in the UMEC, instructions were provided for starting and stopping collection at home.<sup>1</sup>

A questionnaire about the urine collection was administered upon return to UMEC (after stopping collection).<sup>1</sup> A remuneration of \$100 was given to the participant at the end of the questionnaire along with a transportation allowance.<sup>1</sup>

Upon completion of the initial 24-hour urine collection, selected participants were eligible for a second collection scheduled 3-10 days after the initial urine collection following the same procedures as the initial collection.<sup>1,2</sup> For the first half of 2014, a random one-half of eligible participants was selected. Due to logistical constraints with scheduling, for the second half of 2014, all eligible participants were selected to achieve a half sample of those with an initial collection.<sup>2</sup>

### *Cardiovascular Disease (CVD) Risk Subgroup Definitions*

Obesity was defined as a body mass index (BMI) of 30 or greater and overweight as a BMI of 25 to less than 30. Body mass index (BMI) was assessed through weight in kilograms divided by height in meters-squared. Height and weight were measured during the examination by trained personnel using standard equipment and quality control procedures.<sup>3</sup> A few (n=12) participants had a BMI of less than 18.5. Results for participants with BMI less than 25 did not change with or without participants with a BMI less than 18.5, so the two groups were combined.

Physical activity was based on responses to a questionnaires about work, transportation, and leisure time physical activity based on the Global Physical Activity Questionnaire.<sup>4</sup> Definitions for physical activity were based on a previous publication.<sup>5</sup> Recommended physical activity was defined as 75 minutes per week or more at vigorous intensity or 150 minutes per week or more at moderate intensity or the equivalent combination of moderate plus vigorous intensity, with 1 minute of vigorous intensity activity equivalent to 2 minutes of moderate intensity activity. Intermediate was defined as 5 to 74 minutes per week at vigorous intensity activity or 10 to 149 minutes per week at moderate intensity or the equivalent combination of moderate plus vigorous intensity activity. Low physical activity included participants who did not engage in recommended or intermediate physical activity.

Hypertension was defined using the 2017 Hypertension Guidelines<sup>6</sup> and using previous national surveillance criteria.<sup>7</sup> The 2017 Hypertension Guidelines define hypertension as mean systolic blood pressure (SBP)  $\geq 130$  mm Hg, mean diastolic blood pressure (DBP)  $\geq 80$  mm Hg, or self-reported use of antihypertensive medication. For the purpose of this analysis, we defined participants who did not meet the 2017 Hypertension Guidelines definition for hypertension as not hypertensive. The previous national surveillance criteria, defined hypertension as mean SBP  $\geq 140$  mm Hg, mean DBP  $\geq 90$  mm Hg, or self-reported use of antihypertensive medication. Pre-hypertension was defined as a mean SBP of 120–139 mm Hg or a mean DBP of 80–89 mm Hg

## ***eMethods.*** (continued)

among those without hypertension. Normotension was defined as mean SBP <120 mm Hg and mean DBP <80 mm Hg in the absence of antihypertensive medication.

### ***Statistical Methods***

#### ***- Sensitivity Analyses***

Urinary sodium excretion may be underestimated if urine collection is incomplete. Although there is no one recommended method to assess whether collection is complete, para-aminobenzoic acid (PABA), which requires participants to consume PABA supplements, has been recommended by some and has been used.<sup>8,9</sup> Other methods, including urine volume, self-report of missing urine, and the ratio of measured- to expected-24-hour urinary creatinine excretion also have been used.<sup>8,9</sup> In NHANES 2014, completion of 24-hour urine collection was based on adequate duration, no missing urine based on self-report, and adequate urine volume (see Methods). Twenty-four hour urinary creatinine excretion also was measured to further assess the impact of potential incomplete collection, based on the assumption that compared with sodium, urinary creatinine is less variable from day-to-day, and that estimated 24-hour urinary creatinine approximates measured 24-h urinary creatinine. Expected 24-hour urinary creatinine excretion is based on prediction equations. We used two different equations to estimate expected 24-hour urinary creatinine excretion.<sup>10,11</sup> Joossens and Geboers's equation included the participant's sex and weight.<sup>10</sup> Mage's equation included sex, weight, height, age and race (black vs. non-black).<sup>11</sup> We evaluated 1) the proportion of participants who excreted 70% or more of expected creatinine excretion, i.e., presumably complete collection; and 2) mean urinary electrolyte excretion for participants with presumably complete 24 hour urine.

To impute values for missing covariates for exploratory analyses among population subgroups, the Fully Conditional Specification method was used with 5 imputed datasets under the assumption that missing values were missing at random and using all covariates (with missing and non-missing values) in the models (SAS, version 9.3, Cary NC).<sup>12</sup> Mean and 95% confidence intervals for initial 24-hour urinary sodium and potassium excretion by family income and chronic kidney disease subgroups were estimated with imputed data accounting for the complex survey design.

| <b>eTable 1. Participation Status and 24-Hour Urine Values by Specimen, NHANES 2014</b>                  |                               |                  |
|----------------------------------------------------------------------------------------------------------|-------------------------------|------------------|
| <b>Participation status</b>                                                                              | <b>24-Hour Urine Specimen</b> |                  |
|                                                                                                          | <b>First</b>                  | <b>Second</b>    |
| Asked to participate, No. <sup>a</sup>                                                                   | 1103                          | 585              |
| Agreed to participate, No. (%)                                                                           | 1014 (92)                     | 481 (82)         |
| Finished 24-hour urine collection, No. (%)                                                               | 894 (81)                      | 455 (78)         |
| Complete 24-hour urine specimen, No. (%) <sup>b</sup>                                                    | 827 (75)                      | 436 (75)         |
| <b>24-hour urine values, complete specimens<sup>b</sup></b>                                              |                               |                  |
| Volume, unweighted mean (SD), ml                                                                         | 1868 (1026)                   | 1838 (1037)      |
| Volume, weighted mean (95% CI), ml <sup>c</sup>                                                          | 1924 (1793-2054)              | 1905 (1709-2101) |
| Creatinine, unweighted mean (SD), mg                                                                     | 1555 (571)                    | 1544 (572)       |
| Creatinine, weighted mean (95% CI), mg <sup>c</sup>                                                      | 1558 (1488-1628)              | 1562 (1517-1607) |
| Sodium, unweighted mean (SD), mg                                                                         | 3617 (1776)                   | 3731 (1794)      |
| Sodium, weighted mean (95% CI), mg <sup>c</sup>                                                          | 3608 (3414-3803)              | 3758 (3608-3908) |
| Potassium, unweighted mean (SD), mg                                                                      | 2066 (930)                    | 2125 (951)       |
| Potassium, weighted mean (95% CI), mg <sup>c</sup>                                                       | 2155 (2030-2279)              | 2243 (2015-2471) |
| Chloride, unweighted mean (SD), mg                                                                       | 5012 (2601)                   | 5224 (2607)      |
| Chloride, weighted mean (95% CI), mg <sup>c</sup>                                                        | 5026 (4736-5317)              | 5224 (5021-5428) |
| Creatinine, unweighted 50 <sup>th</sup> (25 <sup>th</sup> -75 <sup>th</sup> ) percentiles, mg            | 1452 (1113-1908)              | 1479 (1119-1875) |
| Creatinine, weighted 50 <sup>th</sup> (25 <sup>th</sup> -75 <sup>th</sup> ) percentiles, mg <sup>c</sup> | 1469 (1110-1936)              | 1503 (1134-1927) |

Abbreviations: CI, confidence interval; NHANES, National Health and Nutrition Examination Survey; SD, standard deviation  
SI conversion factors: To convert urine values to mmol, divide creatinine value by 113, sodium value by 23, potassium value by 39 and chloride value by 35.5.

<sup>a</sup> For the first 24-hour urine collection, half of the participants aged 20-69 years in NHANES 2014 were randomly selected. Of these, participants in the examination component who were non-pregnant were eligible and asked to participate. For the second 24-hour urine collection, participants who completed an initial 24-hour urine collection were eligible, but selection varied over time because of logistical constraints in meeting the required sample size. For the first six months of 2014, half of the participants who completed an initial 24-h urine collection, were randomly selected, and were asked to participate in a second collection. For the second six months of 2014, all participants with a complete initial 24-hour urine specimen were selected to participate in the second collection.

<sup>b</sup> Complete specimens met the following criteria: start and end time reported; length of collection >22 hours, total urine volume  $\geq$ 400 ml, participant reported missing no more than a few drops of urine during collection, and if the participant was a women, she reported she did not menstruate during collection.

<sup>c</sup> Weighted estimates and 95% CI. Note: The second urine specimen estimates use the same sample weights as the first.

**eTable 2. 24-Hour Urine Collection Completion Rates by Participant Characteristics, NHANES 2014**

| Participant characteristic <sup>a</sup>     | Asked to Participate (n=1103), No. <sup>b</sup> | Completed (n=827), No. (%) <sup>b</sup> | P Value <sup>c</sup> |
|---------------------------------------------|-------------------------------------------------|-----------------------------------------|----------------------|
| Sex                                         |                                                 |                                         |                      |
| Male                                        | 542                                             | 421 (77.7)                              | 0.04                 |
| Female                                      | 561                                             | 406 (72.4)                              |                      |
| Age range, years                            |                                                 |                                         |                      |
| 20-44                                       | 584                                             | 432 (74.0)                              | 0.41                 |
| 45-69                                       | 519                                             | 395(76.1)                               |                      |
| Race and Hispanic origin                    |                                                 |                                         |                      |
| Non-Hispanic white                          | 448                                             | 339 (75.7)                              | 0.001                |
| Non-Hispanic black                          | 281                                             | 225 (80.1)                              |                      |
| Non-Hispanic Asian                          | 160                                             | 100 (62.5)                              |                      |
| Hispanic                                    | 178                                             | 137 (77.0)                              |                      |
| Family income, % federal poverty guidelines |                                                 |                                         |                      |
| ≤130%                                       | 358                                             | 282 (78.8)                              | 0.11                 |
| >130%                                       | 666                                             | 495 (74.3)                              |                      |
| Education, years                            |                                                 |                                         |                      |
| ≤12 or GED                                  | 476                                             | 372 (78.2)                              | 0.03                 |
| >12                                         | 627                                             | 455 (72.6)                              |                      |
| Body mass index, kg/m <sup>2</sup>          |                                                 |                                         |                      |
| <25.0                                       | 346                                             | 238 (68.8)                              | 0.002                |
| 25.0-29.9                                   | 316                                             | 245 (77.5)                              |                      |
| ≥30.0                                       | 427                                             | 339 (79.4)                              |                      |
| Physical activity                           |                                                 |                                         |                      |
| Recommended                                 | 695                                             | 509 (73.2)                              | 0.06                 |
| Intermediate                                | 163                                             | 120 (73.6)                              |                      |
| Low                                         | 245                                             | 198 (80.8)                              |                      |
| Reported reducing sodium or salt intake     |                                                 |                                         |                      |
| Yes                                         | 530                                             | 400 (75.5)                              | 0.73                 |
| No                                          | 573                                             | 427 (74.5)                              |                      |
| Hypertension                                |                                                 |                                         |                      |
| Yes                                         | 468                                             | 372 (79.5)                              | 0.02                 |
| No                                          | 600                                             | 439 (73.2)                              |                      |
| Diabetes diagnosis                          |                                                 |                                         |                      |
| Yes                                         | 114                                             | 90 (78.9)                               | 0.30                 |
| No                                          | 988                                             | 736 (74.5)                              |                      |
| Chronic kidney disease                      |                                                 |                                         |                      |
| Yes                                         | 131                                             | 103 (78.6)                              | 0.60                 |
| No                                          | 908                                             | 695 (76.5)                              |                      |
| History of cardiovascular disease           |                                                 |                                         |                      |
| Yes                                         | 63                                              | 50 (79.4)                               | 0.40                 |
| No                                          | 1036                                            | 773 (74.6)                              |                      |

Abbreviations: GED, participant passed the General Educational Development tests certifying they have American high school-level academic skills; NHANES, National Health and Nutrition Examination Survey.

<sup>a</sup> See “Methods” for descriptions of participant characteristics

<sup>b</sup> Unweighted No.(%). Sample size in participant subgroups may not add to the totals due to missing information.

<sup>c</sup> Chi-square test.

**eTable 3. Weighted Characteristics and Urine Values by Number of Completed 24-Hour Urine Specimens**

| Characteristic <sup>b</sup>                          | No. of completed 24-Hour urines <sup>a</sup> |                           | P Value <sup>d</sup> |
|------------------------------------------------------|----------------------------------------------|---------------------------|----------------------|
|                                                      | Two (n=436 <sup>c</sup> )                    | One (n=391 <sup>c</sup> ) |                      |
| <b>Sex</b>                                           |                                              |                           |                      |
| Men, unweighted No.                                  | 225                                          | 196                       | 0.93                 |
| Men, weighted % (95% CI) <sup>e</sup>                | 48.7 (43.6-53.8)                             | 49.0 (43.0-54.9)          |                      |
| Women, unweighted No.                                | 211                                          | 195                       |                      |
| Women, weighted % (95% CI) <sup>e</sup>              | 51.3 (46.2-56.4)                             | 51.0 (45.1-57.0)          |                      |
| <b>Race and Hispanic origin</b>                      |                                              |                           |                      |
| Non-Hispanic white, unweighted No.                   | 183                                          | 156                       | 0.99                 |
| Non-Hispanic white, weighted % (95% CI) <sup>e</sup> | 64.0 (50.6-77.4)                             | 63.3 (50.2-76.3)          |                      |
| Non-Hispanic black, unweighted No.                   | 116                                          | 109                       |                      |
| Non-Hispanic black, weighted % (95% CI) <sup>e</sup> | 11.8 (5.3-18.3)                              | 12.0 (2.7-21.3)           |                      |
| Non-Hispanic Asian, unweighted No.                   | 50                                           | 50                        |                      |
| Non-Hispanic Asian, weighted % (95% CI) <sup>e</sup> | 5.6 (1.7-9.5)                                | 5.6 (2.4-8.9)             |                      |
| Hispanic, unweighted No.                             | 69                                           | 68                        |                      |
| Hispanic, weighted % (95% CI) <sup>e</sup>           | 15.5 (8.8-22.2)                              | 16.1 (8.6-23.6)           |                      |
| <b>Hypertension, unweighted No.</b>                  |                                              |                           |                      |
| Hypertension, unweighted No.                         | 200                                          | 172                       | 0.83                 |
| Hypertension, weighted % (95% CI) <sup>e</sup>       | 43.1 (38.5-47.7)                             | 44.0 (34.2-53.8)          |                      |
| <b>Age, unweighted mean (SD), years</b>              |                                              |                           |                      |
| Age, unweighted mean (SD), years                     | 44.7 (14.2)                                  | 43.3 (14.1)               | 0.92                 |
| Age, weighted mean (95% CI), years <sup>e</sup>      | 43.4 (41.5-45.2)                             | 43.2 (40.4-46.1)          |                      |
| <b>BMI, unweighted mean (SD), kg/m<sup>2</sup></b>   |                                              |                           |                      |
| BMI, unweighted mean (SD), kg/m <sup>2</sup>         | 29.5 (8.2)                                   | 30.1 (7.8)                | 0.80                 |
| BMI, weighted mean (95% CI), kg/m <sup>2.e</sup>     | 29.7 (28.6-30.8)                             | 29.9 (28.5-31.4)          |                      |
| <b>Initial 24-hour urine specimen value</b>          |                                              |                           |                      |
| <b>Volume, unweighted mean (SD), ml</b>              |                                              |                           |                      |
| Volume, unweighted mean (SD), ml                     | 1884 (967)                                   | 1850 (1088)               | 0.91                 |
| Volume, weighted mean (95% CI), ml <sup>e</sup>      | 1919 (1776-2061)                             | 1929 (1739-2119)          |                      |
| <b>Creatinine, unweighted mean (SD), mg</b>          |                                              |                           |                      |
| Creatinine, unweighted mean (SD), mg                 | 1543(571)                                    | 1568 (572)                | 0.74                 |
| Creatinine, weighted mean (95% CI), mg <sup>e</sup>  | 1568 (1513-1623)                             | 1547 (1419-1675)          |                      |
| <b>Sodium, unweighted mean (SD), mg</b>              |                                              |                           |                      |
| Sodium, unweighted mean (SD), mg                     | 3684 (1773)                                  | 3544 (1778)               | 0.88                 |
| Sodium, weighted mean (95% CI), mg <sup>e</sup>      | 3627 (3308-3946)                             | 3588 (3223-3952)          |                      |
| <b>Potassium, unweighted mean (SD), mg</b>           |                                              |                           |                      |
| Potassium, unweighted mean (SD), mg                  | 2085 (940)                                   | 2045 (920)                | 0.64                 |
| Potassium, weighted mean (95% CI), mg <sup>e</sup>   | 2178 (1982-2373)                             | 2129 (2008-2250)          |                      |
| <b>Chloride, unweighted mean (SD), mg</b>            |                                              |                           |                      |
| Chloride, unweighted mean (SD), mg                   | 5127 (2610)                                  | 4884 (2588)               | 0.83                 |
| Chloride, weighted mean (95% CI), mg <sup>e</sup>    | 5064 (4626-5502)                             | 4984 (4443-5524)          |                      |

Abbreviations: BMI, body mass index; CI, confidence interval, SD, standard deviation

<sup>a</sup> Non-pregnant participants aged 20-69 years in NHANES 2014 who completed at least one 24-hour urine collection.

<sup>b</sup> See "Methods" for descriptions of participant characteristics

<sup>c</sup> Unweighted sample size

<sup>d</sup> Chi-square test for proportions; two-tailed, t-test for means.

<sup>e</sup> Weighted estimates and 95% CI.

**eTable 4. Within- to Between-Individual Variance in 24-Hour Urinary Electrolyte or Creatinine Excretion<sup>a</sup>**

|            | Ratio <sup>b</sup> of Within- to Between-Individual Variance |                            |                              |
|------------|--------------------------------------------------------------|----------------------------|------------------------------|
|            | Both Sexes<br>n=436 <sup>c</sup>                             | Male<br>n=255 <sup>c</sup> | Female<br>n=211 <sup>c</sup> |
| Sodium     | 1.08                                                         | 0.76                       | 1.99                         |
| Potassium  | 0.60                                                         | 0.66                       | 0.50                         |
| Chloride   | 1.13                                                         | 0.88                       | 1.67                         |
| Creatinine | 0.38                                                         | 0.37                       | 0.40                         |

<sup>a</sup> Non-pregnant adults aged 20-69 years in NHANES 2014 who completed two 24-hour urine collections 3-10 days apart.

<sup>b</sup> Unweighted ratio calculated based on two 24-hour urine collections per person using methods described previously.<sup>13</sup> Total (both sexes together) adjusted for sex.

<sup>c</sup> Unweighted sample size.



| <b>eTable 5. Within-Individual Difference in 24-Hour Urinary Sodium Excretion<sup>a</sup></b> |                      |                                                                   |
|-----------------------------------------------------------------------------------------------|----------------------|-------------------------------------------------------------------|
|                                                                                               | <b>Mean (SD), mg</b> | <b>Median (25<sup>th</sup> to 75<sup>th</sup> percentile), mg</b> |
| Both sexes, n=436 <sup>b</sup>                                                                | -47 (1739)           | -51 (-1020 to 950)                                                |
| Male, n=255 <sup>b</sup>                                                                      | 33 (1734)            | 24 (-1086 to 1196)                                                |
| Female, n=211 <sup>b</sup>                                                                    | -132 (1745)          | -72 (-970 to 821)                                                 |

Abbreviation: SD, standard deviation

SI conversion factor: To convert sodium value to mmol, divide by 23.

<sup>a</sup> Unweighted estimates of within-individual differences in 24-hour urinary sodium excretion for non-pregnant participants aged 20-69 years with two complete 24-hour urine specimens collected 3-10 days apart in NHANES 2014.

<sup>b</sup> Unweighted sample size.

**eTable 6. P Value Comparing Weighted Mean 24-Hour Urinary Sodium Excretion by Group<sup>a</sup>**

| Characteristic, Comparison Groups <sup>b</sup>                      | Both Sexes | Men   | Women |
|---------------------------------------------------------------------|------------|-------|-------|
| Sex, men vs. women                                                  | <.001      | NA    | NA    |
| Age, 20-44 vs. 45-69 years                                          | 0.20       | 0.31  | 0.36  |
| Race and Hispanic origin, Non-Hispanic white vs. non-Hispanic black | 0.99       | 0.25  | 0.17  |
| Race and Hispanic origin, Non-Hispanic white vs. non-Hispanic Asian | 0.88       | 0.84  | 0.16  |
| Race and Hispanic origin, Non-Hispanic white vs. Hispanic           | 0.82       | 0.90  | 0.52  |
| Race and Hispanic origin, Non-Hispanic black vs. non-Hispanic Asian | 0.87       | 0.71  | 0.83  |
| Race and Hispanic origin, Non-Hispanic black vs. Hispanic           | 0.80       | 0.46  | 0.37  |
| Race and Hispanic origin, Non-Hispanic Asian vs. Hispanic           | 0.997      | 0.91  | 0.48  |
| Family income, ≤130% vs. >130% of the federal poverty index         | 0.24       | 0.47  | 0.77  |
| Education, ≤12 years or GED vs. > 12 years                          | 0.36       | 0.67  | 0.70  |
| Body mass index, <25.0 vs. 25.0-29.9 kg/m <sup>2</sup>              | 0.001      | <.001 | 0.18  |
| Body mass index, <25.0 vs. ≥30 kg/m <sup>2</sup>                    | <.001      | <.001 | 0.003 |
| Body mass index, 25.0-29.9 vs. ≥30 kg/m <sup>2</sup>                | 0.11       | 0.005 | 0.07  |
| Physical activity, recommended vs. intermediate                     | 0.19       | 0.94  | 0.37  |
| Physical activity, recommended vs. low                              | 0.99       | 0.91  | 0.46  |
| Physical activity, intermediate vs. low                             | 0.20       | 0.90  | 0.28  |
| Reported reducing sodium or salt intake, yes vs. no                 | 0.75       | 0.96  | 0.11  |
| Hypertension, yes vs. no                                            | 0.04       | 0.03  | 0.48  |
| Diabetes diagnosis, yes vs. no                                      | <.001      | 0.01  | 0.08  |
| Chronic kidney disease, yes vs. no                                  | 0.44       | 0.48  | 0.91  |
| History of cardiovascular disease, yes vs. no                       | 0.49       | 0.20  | 0.82  |

Abbreviations: NA, not applicable, vs., versus.

<sup>a</sup> Two-tailed t-test. See Table 3 for weighted mean 24-hour urinary sodium excretion.

<sup>b</sup> See "Methods" for definitions of participant characteristics and groups.

| <b>Group<sup>b</sup></b>                | <b>Both Sexes</b>        |                                                                              | <b>Men</b>               |                                                                              | <b>Women</b>             |                                                                              |
|-----------------------------------------|--------------------------|------------------------------------------------------------------------------|--------------------------|------------------------------------------------------------------------------|--------------------------|------------------------------------------------------------------------------|
|                                         | <b>Mean (SD),<br/>mg</b> | <b>50<sup>th</sup> (25<sup>th</sup>-75<sup>th</sup>)<br/>percentiles, mg</b> | <b>Mean (SD),<br/>mg</b> | <b>50<sup>th</sup> (25<sup>th</sup>-75<sup>th</sup>)<br/>percentiles, mg</b> | <b>Mean (SD),<br/>mg</b> | <b>50<sup>th</sup> (25<sup>th</sup>-75<sup>th</sup>)<br/>percentiles, mg</b> |
| All participants                        | 3617 (1776)              | 3332 (2334-4517)                                                             | 4135 (1944)              | 3923 (2736-5129)                                                             | 3080 (1394)              | 2896 (2166-3779)                                                             |
| Age, years                              |                          |                                                                              |                          |                                                                              |                          |                                                                              |
| 20-44                                   | 3730 (1813)              | 3423 (2452-4659)                                                             | 4300 (2037)              | 4019 (2754-5532)                                                             | 3156 (1332)              | 2989 (2229-3939)                                                             |
| 45-69                                   | 3494 (1727)              | 3275 (2254-4383)                                                             | 3961 (1828)              | 3788 (2676-4837)                                                             | 2995 (1460)              | 2770 (2044-3644)                                                             |
| Race and Hispanic origin                |                          |                                                                              |                          |                                                                              |                          |                                                                              |
| Non-Hispanic white                      | 3669 (1826)              | 3397 (2290-4584)                                                             | 4242 (1978)              | 3985 (3047-5243)                                                             | 3029 (1388)              | 2676 (2008-3802)                                                             |
| Non-Hispanic black                      | 3627 (1919)              | 3159 (2357-4464)                                                             | 4023 (2078)              | 3612 (2640-4914)                                                             | 3221 (1654)              | 2950 (2216-3956)                                                             |
| Non-Hispanic Asian                      | 3532 (1623)              | 3498 (2292-4413)                                                             | 4001 (1911)              | 3889 (2307-4927)                                                             | 3081 (1135)              | 3003 (2276-3939)                                                             |
| Hispanic                                | 3555 (1488)              | 3393 (2488-4470)                                                             | 4086 (1589)              | 4082 (2952-5162)                                                             | 3061 (1201)              | 3052 (2258-3771)                                                             |
| Family income, % federal poverty index  |                          |                                                                              |                          |                                                                              |                          |                                                                              |
| ≤130%                                   | 3526 (1881)              | 3117 (2238-4459)                                                             | 4086 (2079)              | 3698 (2550-5262)                                                             | 3074 (1570)              | 2741 (2086-3760)                                                             |
| >130%                                   | 3697 (1746)              | 3451 (2475-4580)                                                             | 4211 (1903)              | 4015 (2881-5030)                                                             | 3080 (1295)              | 2935 (2211-3793)                                                             |
| Education, years                        |                          |                                                                              |                          |                                                                              |                          |                                                                              |
| ≤12 or GED                              | 3687 (1700)              | 3400 (2449-4721)                                                             | 4133 (1757)              | 4031 (2836-5283)                                                             | 3133 (1453)              | 2907 (2196-3779)                                                             |
| >12                                     | 3561 (1835)              | 3312 (2307-4418)                                                             | 4138 (2112)              | 3850 (2712-4941)                                                             | 3044 (1354)              | 2870 (2107-3783)                                                             |
| Body mass index, kg/m <sup>2</sup>      |                          |                                                                              |                          |                                                                              |                          |                                                                              |
| <25.0                                   | 2939 (1291)              | 2676 (2027-3725)                                                             | 3192 (1419)              | 2816 (2193-4011)                                                             | 2672 (1084)              | 2572 (1887-3556)                                                             |
| 25.0-29.9                               | 3656 (1581)              | 3474 (2384-4533)                                                             | 4157 (1629)              | 4156 (3001-5129)                                                             | 2943 (1197)              | 2636 (2114-3510)                                                             |
| ≥30.0                                   | 4050 (2036)              | 3741 (2765-4977)                                                             | 4843 (2250)              | 4572 (3424-5886)                                                             | 3397 (1571)              | 3109 (2364-4178)                                                             |
| Physical activity                       |                          |                                                                              |                          |                                                                              |                          |                                                                              |
| Recommended                             | 3617 (1676)              | 3365 (2366-4514)                                                             | 4061 (1793)              | 3803 (2727-5034)                                                             | 3029 (1295)              | 2936 (2129-3811)                                                             |
| Intermediate                            | 3462 (1894)              | 3147 (2287-4145)                                                             | 4159 (2478)              | 3913 (2522-4986)                                                             | 3044 (1283)              | 2915 (2211-3779)                                                             |
| Low                                     | 3713 (1946)              | 3346 (2297-4641)                                                             | 4373 (2120)              | 4374 (2998-5243)                                                             | 3205 (1636)              | 2814 (2169-3832)                                                             |
| Reported reducing sodium or salt intake |                          |                                                                              |                          |                                                                              |                          |                                                                              |
| Yes                                     | 3591 (1816)              | 3305 (2302-4463)                                                             | 4187 (2077)              | 3959 (2678-4941)                                                             | 3025 (1297)              | 2853 (2155-3822)                                                             |
| No                                      | 3642 (1739)              | 3379 (2364-4582)                                                             | 4091 (1825)              | 3871 (2754-5262)                                                             | 3137 (1488)              | 2940 (2169-3734)                                                             |
| Hypertension                            |                          |                                                                              |                          |                                                                              |                          |                                                                              |
| Yes                                     | 3733 (2038)              | 3343 (2321-4573)                                                             | 4297 (2219)              | 3889 (2945-5123)                                                             | 3056 (1551)              | 2894 (2015-3771)                                                             |
| No                                      | 3485 (1498)              | 3274 (2312-4393)                                                             | 3923 (1600)              | 3978 (2617-5009)                                                             | 3090 (1279)              | 2871 (2226-3811)                                                             |

| <b>eTable 7. Unweighted Mean and Percentiles of 24-Hour Urinary Sodium Excretion, NHANES 2014<sup>a</sup></b><br>(continued) |                          |                                                                              |                          |                                                                              |                          |                                                                              |
|------------------------------------------------------------------------------------------------------------------------------|--------------------------|------------------------------------------------------------------------------|--------------------------|------------------------------------------------------------------------------|--------------------------|------------------------------------------------------------------------------|
| <b>Group<sup>b</sup></b>                                                                                                     | <b>Overall</b>           |                                                                              | <b>Men</b>               |                                                                              | <b>Women</b>             |                                                                              |
|                                                                                                                              | <b>Mean (SD),<br/>mg</b> | <b>50<sup>th</sup> (25<sup>th</sup>-75<sup>th</sup>)<br/>percentiles, mg</b> | <b>Mean (SD),<br/>mg</b> | <b>50<sup>th</sup> (25<sup>th</sup>-75<sup>th</sup>)<br/>percentiles, mg</b> | <b>Mean (SD),<br/>mg</b> | <b>50<sup>th</sup> (25<sup>th</sup>-75<sup>th</sup>)<br/>percentiles, mg</b> |
| Diabetes diagnosis                                                                                                           |                          |                                                                              |                          |                                                                              |                          |                                                                              |
| Yes                                                                                                                          | 4379 (2404)              | 3952 (2915-5129)                                                             | 5300 (2518)              | 4725 (3790-6581)                                                             | 3459 (1900)              | 3024 (2348-4054)                                                             |
| No                                                                                                                           | 3525 (1663)              | 3275 (2293-4413)                                                             | 3996 (1818)              | 3809 (2667-4988)                                                             | 3033 (1315)              | 2841 (2140-3771)                                                             |
| Chronic kidney disease                                                                                                       |                          |                                                                              |                          |                                                                              |                          |                                                                              |
| Yes                                                                                                                          | 3411 (2005)              | 3003 (2014-4331)                                                             | 4261 (2614)              | 3725 (2550-5126)                                                             | 2849 (1198)              | 2900 (1939-3474)                                                             |
| No                                                                                                                           | 3660 (1753)              | 3398 (2366-4567)                                                             | 4151 (1868)              | 3985 (2736-5136)                                                             | 3122 (1439)              | 2896 (2188-3816)                                                             |
| History of CVD                                                                                                               |                          |                                                                              |                          |                                                                              |                          |                                                                              |
| Yes                                                                                                                          | 3694 (2634)              | 3002 (2155-4208)                                                             | 4141 (2781)              | 3714 (2258-4784)                                                             | 3125 (2375)              | 2586 (1797-4054)                                                             |
| No                                                                                                                           | 3622 (1706)              | 3348 (2366-4527)                                                             | 4150 (1872)              | 3966 (2802-5162)                                                             | 3084 (1318)              | 2935 (2196-3779)                                                             |

Abbreviations: CVD, cardiovascular disease; GED, participant passed the General Educational Development tests certifying they have American high school-level academic skills; SD, standard deviation.

SI conversion factor: To convert sodium value to mmol, divide by 23.

<sup>a</sup> Unweighted estimates based on the first 24-hour urine specimen. Non-pregnant participants aged 20-69 years in the 2014 National Health and Nutrition Examination Survey who completed an initial 24-hour urine collection. See Table 2 for sample sizes and Table 3 weighted estimates.

<sup>b</sup> See "Methods" for definitions of participant characteristics and groups.

| <b>eTable 8. Weighted Proportion of Adults with 24-Hour Urinary Sodium Excretion <math>\geq</math>2300 mg, NHANES 2014<sup>a</sup></b> |                               |                        |                          |
|----------------------------------------------------------------------------------------------------------------------------------------|-------------------------------|------------------------|--------------------------|
| <b>Group<sup>b</sup></b>                                                                                                               | <b>Both Sexes, % (95% CI)</b> | <b>Men, % (95% CI)</b> | <b>Women, % (95% CI)</b> |
| All participants                                                                                                                       | 75.1 (72.0, 78.2)             | 83.5 (79.9, 87.0)      | 67.1 (62.1, 72.0)        |
| Age, years                                                                                                                             |                               |                        |                          |
| 20-44                                                                                                                                  | 77.1 (74.1, 80.1)             | 84.3 (77.6, 91.0)      | 69.8 (64.1, 75.6)        |
| 45-69                                                                                                                                  | 72.8 (67.5, 78.1)             | 82.5 (75.1, 89.9)      | 64.1 (55.5, 72.7)        |
| Race and Hispanic origin                                                                                                               |                               |                        |                          |
| Non-Hispanic white                                                                                                                     | 73.3 (70.1, 76.5)             | 83.6 (78.9, 88.3)      | 63.2 (57.5, 68.9)        |
| Non-Hispanic black                                                                                                                     | 76.0 (69.1, 82.8)             | 82.7 (75.3, 90.2)      | 70.3 (62.6, 78.1)        |
| Non-Hispanic Asian                                                                                                                     | 77.5 (66.2, 88.7)             | 73.4 (59.0, 87.7)      | --- <sup>c</sup>         |
| Hispanic                                                                                                                               | 79.4 (71.2, 87.6)             | --- <sup>c</sup>       | 72.2 (61.4, 82.9)        |
| Family income, % federal poverty index                                                                                                 |                               |                        |                          |
| $\leq$ 130%                                                                                                                            | 70.4 (64.9, 75.9)             | 79.8 (69.8, 89.7)      | 63.2 (57.7, 68.8)        |
| $>$ 130%                                                                                                                               | 77.2 (73.2, 81.1)             | 85.3 (80.8, 89.7)      | 68.8 (61.8, 75.9)        |
| Education, years                                                                                                                       |                               |                        |                          |
| $\leq$ 12 or GED                                                                                                                       | 75.5 (72.0, 78.9)             | 83.3 (78.8, 87.9)      | 66.1 (57.9, 74.3)        |
| $>$ 12                                                                                                                                 | 74.8 (68.8, 80.8)             | 83.6 (77.7, 89.6)      | 67.6 (58.9, 76.3)        |
| Body mass index, kg/m <sup>2</sup>                                                                                                     |                               |                        |                          |
| $<$ 25.0                                                                                                                               | 63.3 (54.6, 71.9)             | 67.5 (55.8, 79.3)      | 59.8 (50.9, 68.7)        |
| 25.0-29.9                                                                                                                              | 76.9 (68.3, 85.4)             | 85.5 (77.6, 93.4)      | 65.3 (50.8, 79.9)        |
| $\geq$ 30.0                                                                                                                            | 81.7 (77.6, 85.8)             | --- <sup>c</sup>       | 73.2 (66.9, 79.5)        |
| Physical activity                                                                                                                      |                               |                        |                          |
| Recommended                                                                                                                            | 77.4 (73.3, 81.6)             | 85.6 (82.2, 88.9)      | 68.3 (61.8, 74.8)        |
| Intermediate                                                                                                                           | 70.1 (61.7, 78.5)             | 80.0 (67.3, 92.5)      | 63.4 (51.6, 75.2)        |
| Low                                                                                                                                    | 72.1 (65.9, 78.3)             | 78.9 (67.8, 90.1)      | 66.8 (54.2, 79.5)        |
| Reported reducing sodium or salt intake                                                                                                |                               |                        |                          |
| Yes                                                                                                                                    | 75.0 (70.3, 79.6)             | 84.3 (78.8, 89.9)      | 66.9 (59.7, 74.1)        |
| No                                                                                                                                     | 75.2 (71.1, 79.3)             | 82.9 (79.0, 86.7)      | 67.2 (60.7, 73.7)        |
| Hypertension                                                                                                                           |                               |                        |                          |
| Yes                                                                                                                                    | 72.7 (69.1, 76.3)             | 84.5 (79.7, 89.3)      | 59.4 (51.0, 67.9)        |
| No                                                                                                                                     | 76.2 (71.9, 80.5)             | 82.1 (76.7, 87.5)      | 71.4 (66.0, 76.9)        |
| Diabetes diagnosis                                                                                                                     |                               |                        |                          |
| Yes                                                                                                                                    | 85.5 (77.8, 91.2)             | --- <sup>c</sup>       | 76.4 (61.4, 91.4)        |
| No                                                                                                                                     | 74.0 (70.8, 77.3)             | 82.4 (78.5, 86.3)      | 65.9 (60.5, 71.4)        |
| Chronic kidney disease                                                                                                                 |                               |                        |                          |
| Yes                                                                                                                                    | 71.2 (62.0, 80.3)             | --- <sup>c</sup>       | 64.4 (47.9, 79.0)        |
| No                                                                                                                                     | 75.5 (71.7, 79.2)             | 83.0 (78.8, 87.2)      | 67.8 (61.3, 74.4)        |
| History of CVD                                                                                                                         |                               |                        |                          |
| Yes                                                                                                                                    | 66.6 (47.6, 85.5)             | --- <sup>c</sup>       | --- <sup>c</sup>         |
| No                                                                                                                                     | 75.6 (72.3, 78.9)             | 84.3 (80.8, 87.9)      | 67.3 (62.0, 72.7)        |

Abbreviations: CI, confidence interval; CVD, cardiovascular disease, GED, participant passed the General Educational Development tests certifying they have American high school-level academic skills. NHANES, National Health and Nutrition Examination Survey;

<sup>a</sup> Weighted proportion (95% CI) of non-pregnant adults, aged 20-69 years, with initial 24-hour urinary sodium excretion  $\geq$ 2300 mg. Sample size (n) are available in Table 2 (in the main paper). Values account for oversampling, non-coverage, and non-response.

<sup>b</sup> See "Methods" for definitions of participant characteristics and groups.

<sup>c</sup> Estimate not shown, statistically unreliable based on relative standard error  $>$  30%.

**eTable 9. P Value Comparing Weighted Mean 24-Hour Urinary Potassium Excretion by Group<sup>a</sup>**

| Characteristic, Comparison Groups <sup>b</sup>                      | Both Sexes | Men   | Women |
|---------------------------------------------------------------------|------------|-------|-------|
| Sex, men vs. women                                                  | <.001      | NA    | NA    |
| Age, 20-44 vs. 45-69 years                                          | 0.002      | 0.001 | 0.03  |
| Race and Hispanic origin, Non-Hispanic white vs. non-Hispanic black | <.001      | <.001 | 0.01  |
| Race and Hispanic origin, Non-Hispanic white vs. non-Hispanic Asian | 0.16       | 0.76  | 0.02  |
| Race and Hispanic origin, Non-Hispanic white vs. Hispanic           | 0.04       | 0.17  | 0.04  |
| Race and Hispanic origin, Non-Hispanic black vs. non-Hispanic Asian | 0.02       | 0.01  | 0.45  |
| Race and Hispanic origin, Non-Hispanic black vs. Hispanic           | 0.04       | 0.01  | 0.68  |
| Race and Hispanic origin, Non-Hispanic Asian vs. Hispanic           | 0.65       | 0.33  | 0.90  |
| Family income, ≤130% vs. >130% of the federal poverty index         | <.001      | <.001 | 0.003 |
| Education ≤12 years or GED vs. > 12 years                           | 0.01       | 0.02  | 0.002 |
| Body mass index, <25.0 vs. 25.0-29.9 kg/m <sup>2</sup>              | 0.99       | 0.30  | 0.24  |
| Body mass index, <25.0 vs. ≥30 kg/m <sup>2</sup>                    | 0.05       | 0.001 | 0.92  |
| Body mass index, 25.0-29.9 vs. ≥30 kg/m <sup>2</sup>                | 0.14       | 0.03  | 0.21  |
| Physical activity, recommended vs. intermediate                     | 0.68       | 0.87  | 0.32  |
| Physical activity, recommended vs. low                              | 0.23       | 0.79  | 0.39  |
| Physical activity, intermediate vs. low                             | 0.17       | 0.69  | 0.18  |
| Reported reducing sodium or salt intake, yes vs. no                 | 0.30       | 0.50  | 0.71  |
| Hypertension, yes vs. no                                            | 0.86       | 0.79  | 0.67  |
| Diabetes diagnosis, yes vs. no                                      | 0.38       | 0.59  | 0.32  |
| Chronic kidney disease, yes vs. no                                  | 0.82       | 0.06  | 0.21  |
| History of cardiovascular disease, yes vs. no                       | 0.45       | 0.94  | 0.37  |

Abbreviations: NA, not applicable

<sup>a</sup> Two-tailed t-test. See Table 4 for weighted mean 24-hour urinary potassium excretion.

<sup>b</sup> See “Methods” for definitions of participant characteristics and groups.

| <b>Group<sup>b</sup></b>                | <b>Both Sexes</b>        |                                                                              | <b>Men</b>               |                                                                              | <b>Women</b>             |                                                                              |
|-----------------------------------------|--------------------------|------------------------------------------------------------------------------|--------------------------|------------------------------------------------------------------------------|--------------------------|------------------------------------------------------------------------------|
|                                         | <b>Mean (SD),<br/>mg</b> | <b>50<sup>th</sup> (25<sup>th</sup>-75<sup>th</sup>)<br/>percentiles, mg</b> | <b>Mean (SD),<br/>mg</b> | <b>50<sup>th</sup> (25<sup>th</sup>-75<sup>th</sup>)<br/>percentiles, mg</b> | <b>Mean (SD),<br/>mg</b> | <b>50<sup>th</sup> (25<sup>th</sup>-75<sup>th</sup>)<br/>percentiles, mg</b> |
| All Participants                        | 2066 (930)               | 1940 (1358-2546)                                                             | 2291 (957)               | 2237 (1633-2911)                                                             | 1832 (842)               | 1709 (1245-2191)                                                             |
| Age, years                              |                          |                                                                              |                          |                                                                              |                          |                                                                              |
| 20-44                                   | 1948 (855)               | 1838 (1294-2420)                                                             | 2164 (909)               | 2167 (1529-2760)                                                             | 1730 (737)               | 1638 (1199-2092)                                                             |
| 45-69                                   | 2194 (991)               | 2053 (1488-2752)                                                             | 2425 (990)               | 2286 (1719-3067)                                                             | 1948 (934)               | 1791 (1283-2315)                                                             |
| Race and Hispanic origin                |                          |                                                                              |                          |                                                                              |                          |                                                                              |
| Non-Hispanic white                      | 2225 (996)               | 2097 (1529-2934)                                                             | 2436 (950)               | 2347 (1736-3136)                                                             | 1989 (996)               | 1754 (1269-2394)                                                             |
| Non-Hispanic black                      | 1813 (891)               | 1690 (1223-2252)                                                             | 1922 (977)               | 1762 (1316-2268)                                                             | 1702 (783)               | 1559 (1118-2231)                                                             |
| Non-Hispanic Asian                      | 2197 (810)               | 2101 (1627-2566)                                                             | 2559 (822)               | 2519 (2118-2985)                                                             | 1850 (632)               | 1775 (1428-2157)                                                             |
| Hispanic                                | 2045 (802)               | 1999 (1474-2463)                                                             | 2367 (814)               | 2382 (1824-2840)                                                             | 1746 (668)               | 1735 (1282-2092)                                                             |
| Family income, % federal poverty index  |                          |                                                                              |                          |                                                                              |                          |                                                                              |
| ≤130%                                   | 1800 (791)               | 1678 (1187-2279)                                                             | 1979 (833)               | 2019 (1350-2519)                                                             | 1655 (727)               | 1490 (1119-2062)                                                             |
| >130%                                   | 2236 (976)               | 2104 (1566-2808)                                                             | 2451 (972)               | 2383 (1739-3115)                                                             | 1978 (918)               | 1834 (1328-2337)                                                             |
| Education, years                        |                          |                                                                              |                          |                                                                              |                          |                                                                              |
| ≤12 or GED                              | 1926 (828)               | 1868 (1303-2386)                                                             | 2136 (868)               | 2132 (1545-2587)                                                             | 1667 (694)               | 1543 (1165-2027)                                                             |
| >12                                     | 2180 (993)               | 2034 (1474-2748)                                                             | 2439 (1015)              | 2384 (1694-3130)                                                             | 1947 (914)               | 1762 (1308-2370)                                                             |
| Body mass index (BMI) kg/m <sup>2</sup> |                          |                                                                              |                          |                                                                              |                          |                                                                              |
| <25.0                                   | 1939 (908)               | 1788 (1223-2407)                                                             | 2073 (929)               | 2045 (1342-2606)                                                             | 1797 (867)               | 1644 (1176-2092)                                                             |
| 25.0-29.9                               | 2026 (838)               | 1943 (1363-2514)                                                             | 2237 (873)               | 2199 (1637-2800)                                                             | 1724 (682)               | 1600 (1306-2146)                                                             |
| ≥30.0                                   | 2182 (999)               | 2032 (1502-2760)                                                             | 2521 (1013)              | 2382 (1917-3101)                                                             | 1902 (898)               | 1761 (1265-2295)                                                             |
| Physical activity                       |                          |                                                                              |                          |                                                                              |                          |                                                                              |
| Recommended                             | 2083 (903)               | 1961 (1391-2587)                                                             | 2267 (938)               | 2191 (1563-2912)                                                             | 1839 (793)               | 1723 (1273-2172)                                                             |
| Intermediate                            | 2070 (897)               | 1961 (1512-2532)                                                             | 2304 (928)               | 2237 (1659-2973)                                                             | 1930 (854)               | 1806 (1242-2258)                                                             |
| Low                                     | 2019 (1017)              | 1911 (1306-2451)                                                             | 2363 (1038)              | 2300 (1823-2865)                                                             | 1754 (922)               | 1611 (1148-2157)                                                             |
| Reported reducing sodium or salt intake |                          |                                                                              |                          |                                                                              |                          |                                                                              |
| Yes                                     | 2039 (929)               | 1896 (1333-2579)                                                             | 2310 (993)               | 2212 (1644-2934)                                                             | 1780 (783)               | 1645 (1240-2181)                                                             |
| No                                      | 2091 (932)               | 1979 (1423-2529)                                                             | 2274 (926)               | 2256 (1598-2851)                                                             | 1886 (897)               | 1775 (1258-2231)                                                             |

**eTable 10. Unweighted Mean and Percentiles of 24-Hour Urinary Potassium, NHANES 2014<sup>a</sup> (continued)**

| Group <sup>b</sup>     | Both Sexes       |                                                                           | Men              |                                                                           | Women            |                                                                           |
|------------------------|------------------|---------------------------------------------------------------------------|------------------|---------------------------------------------------------------------------|------------------|---------------------------------------------------------------------------|
|                        | Mean (SD),<br>mg | 50 <sup>th</sup> (25 <sup>th</sup> -75 <sup>th</sup> )<br>percentiles, mg | Mean (SD),<br>mg | 50 <sup>th</sup> (25 <sup>th</sup> -75 <sup>th</sup> )<br>percentiles, mg | Mean (SD),<br>mg | 50 <sup>th</sup> (25 <sup>th</sup> -75 <sup>th</sup> )<br>percentiles, mg |
| Hypertension           |                  |                                                                           |                  |                                                                           |                  |                                                                           |
| Yes                    | 2098 (967)       | 1948 (1418-2607)                                                          | 2315 (997)       | 2212 (1633-2934)                                                          | 1837 (862)       | 1708 (1273-2231)                                                          |
| No                     | 2034 (902)       | 1921 (1339-2520)                                                          | 2259 (931)       | 2236 (1590-2911)                                                          | 1832 (825)       | 1709 (1240-2181)                                                          |
| Diabetes diagnosis     |                  |                                                                           |                  |                                                                           |                  |                                                                           |
| Yes                    | 2363 (1200)      | 2132 (1537-2973)                                                          | 2670 (1218)      | 2547 (1895-3183)                                                          | 2056 (1113)      | 1754 (1378-2295)                                                          |
| No                     | 2030 (886)       | 1924 (1342-2509)                                                          | 2245 (912)       | 2211 (1605-2838)                                                          | 1806 (800)       | 1702 (1220-2157)                                                          |
| Chronic kidney disease |                  |                                                                           |                  |                                                                           |                  |                                                                           |
| Yes                    | 2054 (1197)      | 1754 (1322-2459)                                                          | 2301 (1286)      | 1943 (1529-2934)                                                          | 1891 (1114)      | 1684 (1255-2366)                                                          |
| No                     | 2081 (884)       | 1976 (1394-2586)                                                          | 2306 (909)       | 2265 (1659-2911)                                                          | 1836 (788)       | 1713 (1258-2192)                                                          |
| History of CVD disease |                  |                                                                           |                  |                                                                           |                  |                                                                           |
| Yes                    | 2235 (1341)      | 2012 (1221-2846)                                                          | 2524 (1530)      | 2309 (1505-3055)                                                          | 1867 (967)       | 1562 (1147-2279)                                                          |
| No                     | 2055 (896)       | 1940 (1363-2532)                                                          | 2279 (901)       | 2233 (1636-2911)                                                          | 1826 (832)       | 1711 (1255-2181)                                                          |

Abbreviations: CVD, cardiovascular disease; GED, participant passed the General Educational Development tests certifying they have American high school-level academic skills; SD, standard deviation.

SI conversion factor: To convert potassium value to mmol, divide by 39.

<sup>a</sup> Unweighted estimates based on the first 24-hour urine specimen. Non-pregnant participants aged 20-69 years in the 2014 National Health and Nutrition Examination Survey who completed an initial 24-hour urine collection. See Table 2 for sample sizes and Table 4 weighted estimates.

<sup>b</sup> See "Methods" for definitions of participant characteristics and groups.



**eTable 11. Weighted Mean and Percentiles, Ratio of 24-Hour Urinary Sodium-to-Potassium Excretion, US Adults, 2014<sup>a</sup>**

| Group <sup>b</sup>                      | Both Sexes                     |                                                                                     | Men                            |                                                                                     | Women                          |                                                                                     |
|-----------------------------------------|--------------------------------|-------------------------------------------------------------------------------------|--------------------------------|-------------------------------------------------------------------------------------|--------------------------------|-------------------------------------------------------------------------------------|
|                                         | Mean (95% CI), mg <sup>c</sup> | 50 <sup>th</sup> (25 <sup>th</sup> -75 <sup>th</sup> ) Percentiles, mg <sup>c</sup> | Mean (95% CI), mg <sup>c</sup> | 50 <sup>th</sup> (25 <sup>th</sup> -75 <sup>th</sup> ) Percentiles, mg <sup>c</sup> | Mean (95% CI), mg <sup>c</sup> | 50 <sup>th</sup> (25 <sup>th</sup> -75 <sup>th</sup> ) Percentiles, mg <sup>c</sup> |
| All participants                        | 3.17 (2.91-3.43)               | 2.87 (2.05-3.93)                                                                    | 3.32(2.96-3.67)                | 3.01 (2.15-3.97)                                                                    | 3.03 (2.76-3.29)               | 2.79 (1.91-3.83)                                                                    |
| Age, years                              |                                |                                                                                     |                                |                                                                                     |                                |                                                                                     |
| 20-44                                   | 3.50 (3.22-3.78)               | 3.20 (2.34-4.32)                                                                    | 3.69 (3.29-4.09)               | 3.35 (2.62-4.37)                                                                    | 3.31 (3.05-3.57)               | 2.99 (2.19-4.22)                                                                    |
| 45-69                                   | 2.80 (2.53-3.06)               | 2.56 (1.88-3.55)                                                                    | 2.88 (2.47-3.28)               | 2.57 (1.97-3.48)                                                                    | 2.73 (2.47-2.98)               | 2.52 (1.69-3.64)                                                                    |
| Race and Hispanic origin                |                                |                                                                                     |                                |                                                                                     |                                |                                                                                     |
| Non-Hispanic white                      | 2.98 (2.69-3.27)               | 2.69 (1.90-3.71)                                                                    | 3.15 (2.71-3.60)               | 2.80 (2.09-3.88)                                                                    | 2.80 (2.55-3.06)               | 2.53 (1.79-3.65)                                                                    |
| Non-Hispanic black                      | 3.75 (3.53-3.98)               | 3.59 (2.64-4.49)                                                                    | 3.99 (3.62-4.36)               | 3.71 (2.76-4.51)                                                                    | 3.56 (3.28-3.83)               | 3.43 (2.51-4.46)                                                                    |
| Non-Hispanic Asian                      | 3.15 (2.73-3.57)               | 3.01 (2.27-3.91)                                                                    | 2.93 (2.60-3.26)               | 2.91 (2.02-3.51)                                                                    | 3.33 (2.72-3.94)               | 2.98 (2.28-4.31)                                                                    |
| Hispanic                                | 3.42 (2.89-3.95)               | 3.01 (2.27-3.91)                                                                    | 3.58 (2.64-4.52)               | 2.99 (2.29-3.85)                                                                    | 3.25 (2.86-3.63)               | 2.90 (2.28-4.08)                                                                    |
| Family income, % federal poverty index  |                                |                                                                                     |                                |                                                                                     |                                |                                                                                     |
| ≤130                                    | 3.53 (3.20-3.87)               | 3.23 (2.34-4.32)                                                                    | 3.91 (3.36-4.45)               | 3.55 (2.56-4.66)                                                                    | 3.25 (2.92-3.58)               | 3.00 (2.17-4.07)                                                                    |
| >130                                    | 3.04 (2.71-3.37)               | 2.78 (1.85-3.65)                                                                    | 3.16 (2.71-3.60)               | 2.89 (2.14-3.71)                                                                    | 2.92 (2.60-3.23)               | 2.64 (1.85-3.67)                                                                    |
| Education, years                        |                                |                                                                                     |                                |                                                                                     |                                |                                                                                     |
| ≤12 or GED                              | 3.51 (3.30-3.73)               | 3.12 (2.45-4.28)                                                                    | 3.59 (3.24-3.95)               | 3.32 (2.63-4.20)                                                                    | 3.42 (3.12-3.72)               | 2.96 (2.19-4.30)                                                                    |
| >12                                     | 2.93 (2.55-3.31)               | 2.65 (1.85-3.65)                                                                    | 3.08 (2.55-3.62)               | 2.67 (1.95-3.71)                                                                    | 2.80 (2.48-3.13)               | 2.62 (1.70-3.65)                                                                    |
| Body mass index, kg/m <sup>2</sup>      |                                |                                                                                     |                                |                                                                                     |                                |                                                                                     |
| <25.0                                   | 2.75 (2.46-3.04)               | 2.37 (1.63-3.54)                                                                    | 2.84 (2.45-3.24)               | 2.40 (1.85-3.44)                                                                    | 2.67 (2.26-3.09)               | 2.22 (1.57-3.61)                                                                    |
| 25.0-29.9                               | 3.41 (2.90-3.92)               | 3.01 (2.34-3.84)                                                                    | 3.53 (2.88-4.18)               | 3.03 (2.49-3.85)                                                                    | 3.25 (2.82-3.67)               | 2.85 (2.20-3.82)                                                                    |
| ≥30.0                                   | 3.25 (2.96-3.54)               | 3.00 (2.27-3.96)                                                                    | 3.27 (2.88-3.67)               | 3.02 (2.24-4.12)                                                                    | 3.15 (2.83-3.46)               | 2.98 (1.92-3.96)                                                                    |
| Physical activity                       |                                |                                                                                     |                                |                                                                                     |                                |                                                                                     |
| Recommended                             | 3.15 (2.88-3.43)               | 2.87 (2.01-3.89)                                                                    | 3.33 (2.94-3.71)               | 2.95 (2.18-3.97)                                                                    | 2.96 (2.68-3.23)               | 2.80 ( 1.84-3.81)                                                                   |
| Intermediate                            | 2.86 (2.41-3.30)               | 2.54 (1.90-3.64)                                                                    | 3.32 (2.51-4.14)               | 2.97 (2.12-4.33)                                                                    | 2.54 (2.07-3.02)               | 2.20 (1.86-3.25)                                                                    |
| Low                                     | 3.41 (3.08-3.74)               | 3.08 (2.27-4.21)                                                                    | 3.27 (2.88-3.67)               | 3.05 (2.20-4.04)                                                                    | 3.52 (3.07-3.98)               | 3.14 (2.32-4.50)                                                                    |
| Reported reducing sodium or salt intake |                                |                                                                                     |                                |                                                                                     |                                |                                                                                     |
| Yes                                     | 3.19 (2.83-3.49)               | 2.85 (2.00-3.84)                                                                    | 3.39 (2.96-3.81)               | 2.80 (2.13-3.92)                                                                    | 3.02 (2.59-3.44)               | 2.87 (1.97-3.83)                                                                    |
| No                                      | 3.15 (2.82-3.47)               | 2.91 (2.07-3.96)                                                                    | 3.26 (2.89-3.64)               | 3.05 (2.20-4.04)                                                                    | 3.03 (2.74-3.32)               | 2.73 (1.88-3.86)                                                                    |
| Hypertension                            |                                |                                                                                     |                                |                                                                                     |                                |                                                                                     |
| Yes                                     | 3.16 (2.83-3.49)               | 2.74 (2.07-3.81)                                                                    | 3.48 (3.07-3.90)               | 3.02 (2.26-4.18)                                                                    | 2.79 (2.38-3.20)               | 2.58 (1.89-3.60)                                                                    |
| No                                      | 3.15 (2.82-3.47)               | 2.95 (2.00-3.96)                                                                    | 3.14 (2.70-3.59)               | 2.96 (2.09-3.84)                                                                    | 3.15 (2.84-3.46)               | 2.89 (1.89-3.92)                                                                    |

**eTable 11. Weighted Mean and Percentiles, Ratio of 24-Hour Urinary Sodium-to-Potassium Excretion, US Adults, 2014<sup>a</sup>**

| Group <sup>b</sup>     | Both Sexes                     |                                                                                     | Men                            |                                                                                     | Women                          |                                                                                     |
|------------------------|--------------------------------|-------------------------------------------------------------------------------------|--------------------------------|-------------------------------------------------------------------------------------|--------------------------------|-------------------------------------------------------------------------------------|
|                        | Mean (95% CI), mg <sup>c</sup> | 50 <sup>th</sup> (25 <sup>th</sup> -75 <sup>th</sup> ) Percentiles, mg <sup>c</sup> | Mean (95% CI), mg <sup>c</sup> | 50 <sup>th</sup> (25 <sup>th</sup> -75 <sup>th</sup> ) Percentiles, mg <sup>c</sup> | Mean (95% CI), mg <sup>c</sup> | 50 <sup>th</sup> (25 <sup>th</sup> -75 <sup>th</sup> ) Percentiles, mg <sup>c</sup> |
| Diabetes diagnosis     |                                |                                                                                     |                                |                                                                                     |                                |                                                                                     |
| Yes                    | 3.38 (2.89-3.86)               | 3.12 (2.15-3.95)                                                                    | 3.84 (3.04-4.64)               | 3.56 (2.40-5.54)                                                                    | 2.96 (2.68-3.24)               | 2.87 (1.96-3.63)                                                                    |
| No                     | 3.14 (2.87-3.42)               | 2.85 (2.04-3.92)                                                                    | 3.26 (2.90-3.62)               | 2.96 (2.15-3.87)                                                                    | 3.03 (2.74-3.33)               | 2.75 (1.87-3.92)                                                                    |
| Chronic kidney disease |                                |                                                                                     |                                |                                                                                     |                                |                                                                                     |
| Yes                    | 3.25 (2.95-3.56)               | 2.74 (1.93-4.18)                                                                    | 4.12 (3.19-5.05)               | 3.87 (2.60-5.32)                                                                    | 2.80 (2.33-3.28)               | 2.46 (1.89-3.52)                                                                    |
| No                     | 3.15 (2.86-3.43)               | 2.87 (2.07-3.88)                                                                    | 3.25 (2.89-3.61)               | 2.99 (2.15-3.92)                                                                    | 3.04 (2.75-3.32)               | 2.80 (1.88-3.84)                                                                    |
| History of CVD         |                                |                                                                                     |                                |                                                                                     |                                |                                                                                     |
| Yes                    | 2.92 (2.30-3.54)               | 2.39 (1.68-3.52)                                                                    | 3.14 (2.00-4.29)               | 2.57 (1.50-3.51)                                                                    | 2.64 (1.98-3.30)               | 2.30 (1.67-3.12)                                                                    |
| No                     | 3.18 (2.90-3.46)               | 2.89 (2.07-3.95)                                                                    | 3.33 (2.94-3.71)               | 3.02 (2.19-3.97)                                                                    | 3.05 (2.78-3.31)               | 2.80 (1.91-3.85)                                                                    |

Abbreviations: CI, confidence interval; CVD, cardiovascular disease; GED, participant passed the General Educational Development tests certifying they have American high school-level academic skills.

<sup>a</sup> Molar ratio of 24-hour urinary sodium-to-potassium excretion based on the first 24-hour urine specimen. Non-pregnant participants aged 20-69 years in the 2014 National Health and Nutrition Examination Survey who completed an initial 24-hour urine collection.

<sup>b</sup> See "Methods" for definitions of participant characteristics and groups.

<sup>c</sup> Weighted estimates and 95% CI. See Table 2 for sample sizes.

**eTable 12. P Value Comparing Weighted Mean Ratio of 24-Hour Urinary Sodium-to-Potassium Excretion by Group<sup>a</sup>**

| Characteristic, Comparison Groups <sup>b</sup>                      | Both Sexes | Men   | Women |
|---------------------------------------------------------------------|------------|-------|-------|
| Sex, men vs. women                                                  | 0.08       | NA    | NA    |
| Age, 20-44 vs. 45-69 years                                          | <.001      | <.001 | <.001 |
| Race and Hispanic origin, Non-Hispanic white vs. non-Hispanic black | <.001      | 0.001 | 0.001 |
| Race and Hispanic origin, Non-Hispanic white vs. non-Hispanic Asian | 0.42       | 0.38  | 0.07  |
| Race and Hispanic origin, Non-Hispanic white vs. Hispanic           | 0.11       | 0.40  | 0.03  |
| Race and Hispanic origin, Non-Hispanic black vs. non-Hispanic Asian | 0.01       | <.001 | 0.45  |
| Race and Hispanic origin, Non-Hispanic black vs. Hispanic           | 0.21       | 0.35  | 0.12  |
| Race and Hispanic origin, Non-Hispanic Asian vs. Hispanic           | 0.23       | 0.10  | 0.76  |
| Family income, ≤130% vs. >130% of the federal poverty index         | 0.05       | 0.06  | 0.09  |
| Education ≤12 years or GED vs. > 12 years                           | 0.01       | 0.12  | 0.01  |
| Body mass index, <25.0 vs. 25.0-29.9 kg/m <sup>2</sup>              | 0.02       | 0.07  | 0.06  |
| Body mass index, <25.0 vs. ≥30 kg/m <sup>2</sup>                    | 0.01       | 0.07  | 0.02  |
| Body mass index, 25.0-29.9 vs. ≥30 kg/m <sup>2</sup>                | 0.52       | 0.60  | 0.71  |
| Physical activity, recommended vs. intermediate                     | 0.15       | 0.99  | 0.07  |
| Physical activity, recommended vs. low                              | 0.12       | 0.79  | 0.02  |
| Physical activity, intermediate vs. low                             | 0.02       | 0.89  | 0.01  |
| Reported reducing sodium or salt intake, yes vs. no                 | 0.79       | 0.47  | 0.95  |
| Hypertension, yes vs. no                                            | 0.94       | 0.20  | 0.12  |
| Diabetes diagnosis, yes vs. no                                      | 0.36       | 0.16  | 0.70  |
| Chronic kidney disease, yes vs. no                                  | 0.52       | 0.09  | 0.34  |
| History of cardiovascular disease, yes vs. no                       | 0.47       | 0.76  | 0.21  |

Abbreviations: NA, not applicable.

<sup>a</sup> Two-tailed t-test. See eTable 11 for weighted mean molar ratio of 24-hour urinary sodium-to-potassium excretion.

<sup>b</sup> See "Methods" for definitions of participant characteristics and groups.

**eTable 13. Weighted Proportion of Adults With >70% of Expected 24-Hour Urinary Creatinine Excretion, NHANES 2014<sup>a</sup>**

| Characteristic <sup>b</sup>             | No. of Total Participants <sup>c</sup> | Joossens and Geboers's Criteria <sup>d</sup> |                                               |                      | Mage's Criteria <sup>e</sup> |                                               |                      |
|-----------------------------------------|----------------------------------------|----------------------------------------------|-----------------------------------------------|----------------------|------------------------------|-----------------------------------------------|----------------------|
|                                         |                                        | No. <sup>f</sup>                             | Weighted % of Total Participants <sup>g</sup> | P Value <sup>h</sup> | No. <sup>f</sup>             | Weighted % of Total Participants <sup>g</sup> | P Value <sup>h</sup> |
| All participants                        | 821                                    | 607                                          | 73.0                                          |                      | 757                          | 94.2                                          |                      |
| Sex                                     |                                        |                                              |                                               |                      |                              |                                               |                      |
| Male                                    | 419                                    | 364                                          | 87.7                                          | <.001                | 397                          | 95.0                                          | 0.40                 |
| Female                                  | 402                                    | 243                                          | 59.0                                          |                      | 376                          | 93.6                                          |                      |
| Age, years                              |                                        |                                              |                                               |                      |                              |                                               |                      |
| 20-44                                   | 429                                    | 347                                          | 80.7                                          | <.001                | 395                          | 92.5                                          | 0.08                 |
| 45-69                                   | 392                                    | 260                                          | 64.3                                          |                      | 378                          | 96.3                                          |                      |
| Race and Hispanic origin <sup>g</sup>   |                                        |                                              |                                               |                      |                              |                                               |                      |
| Non-Hispanic white                      | 337                                    | 234                                          | 71.2                                          | 0.04                 | 319                          | 95.0                                          | ---i                 |
| Non-Hispanic black                      | 222                                    | 164                                          | 74.1                                          |                      | 202                          | 90.3                                          |                      |
| Non-Hispanic Asian                      | 100                                    | 90                                           | 92.1                                          |                      | 100                          | 100.0                                         |                      |
| Hispanic                                | 136                                    | 98                                           | 72.2                                          |                      | 127                          | 92.1                                          |                      |
| Family income, % federal poverty index  |                                        |                                              |                                               |                      |                              |                                               |                      |
| ≤130%                                   | 280                                    | 186                                          | 65.4                                          | 0.02                 | 257                          | 90.7                                          | 0.01                 |
| >130%                                   | 491                                    | 389                                          | 76.4                                          |                      | 470                          | 95.7                                          |                      |
| Education, years                        |                                        |                                              |                                               |                      |                              |                                               |                      |
| <12 or GED                              | 368                                    | 251                                          | 68.6                                          | 0.03                 | 337                          | 91.4                                          | 0.02                 |
| >12                                     | 453                                    | 356                                          | 75.9                                          |                      | 436                          | 96.3                                          |                      |
| Body mass index, kg/m <sup>2</sup>      |                                        |                                              |                                               |                      |                              |                                               |                      |
| <25.0                                   | 238                                    | 207                                          | 85.3                                          | <.001                | 225                          | 94.6                                          | 0.08                 |
| 25.0-29.9                               | 245                                    | 214                                          | 87.3                                          |                      | 235                          | 97.2                                          |                      |
| ≥30.0                                   | 338                                    | 186                                          | 53.3                                          |                      | 313                          | 91.8                                          |                      |
| Physical activity                       |                                        |                                              |                                               |                      |                              |                                               |                      |
| Recommended                             | 507                                    | 405                                          | 80.0                                          | 0.001                | 478                          | 94.5                                          | 0.72                 |
| Intermediate                            | 119                                    | 74                                           | 64.7                                          |                      | 113                          | 95.8                                          |                      |
| None                                    | 195                                    | 128                                          | 59.1                                          |                      | 182                          | 92.7                                          |                      |
| Reported reducing sodium or salt intake |                                        |                                              |                                               |                      |                              |                                               |                      |
| Yes                                     | 396                                    | 273                                          | 67.6                                          | 0.09                 | 370                          | 94.0                                          | 0.04                 |
| No                                      | 425                                    | 334                                          | 77.3                                          |                      | 403                          | 94.5                                          |                      |
| Hypertension                            |                                        |                                              |                                               |                      |                              |                                               |                      |
| Yes                                     | 368                                    | 238                                          | 63.6                                          | <.001                | 348                          | 96.1                                          | 0.16                 |
| No                                      | 437                                    | 354                                          | 79.4                                          |                      | 403                          | 94.5                                          |                      |

**eTable 13. Weighted Proportion of Adults With >70% of Expected 24-Hour Urinary Creatinine Excretion, NHANES 2014<sup>a</sup> (continued)**

| Characteristic <sup>b</sup> | No. of Total Participants <sup>c</sup> | Joossens and Geboers's Criteria <sup>d</sup> |                                               |                      | Mage's Criteria <sup>e</sup> |                                               |                      |
|-----------------------------|----------------------------------------|----------------------------------------------|-----------------------------------------------|----------------------|------------------------------|-----------------------------------------------|----------------------|
|                             |                                        | No. <sup>f</sup>                             | Weighted % of Total Participants <sup>g</sup> | P Value <sup>h</sup> | No. <sup>f</sup>             | Weighted % of Total Participants <sup>g</sup> | P Value <sup>h</sup> |
| Diabetes diagnosis          |                                        |                                              |                                               |                      |                              |                                               |                      |
| Yes                         | 87                                     | 42                                           | 45.3                                          | 0.007                | 78                           | 92.0                                          | 0.48                 |
| No                          | 733                                    | 564                                          | 75.8                                          |                      | 694                          | 94.5                                          |                      |
| Chronic kidney disease      |                                        |                                              |                                               |                      |                              |                                               |                      |
| Yes                         | 102                                    | 59                                           | 54.0                                          | 0.04                 | 97                           | 96.9                                          | 0.31                 |
| No                          | 690                                    | 529                                          | 75.3                                          |                      | 652                          | 94.1                                          |                      |
| History of CVD              |                                        |                                              |                                               |                      |                              |                                               |                      |
| Yes                         | 49                                     | 31                                           | 62.6                                          | 0.27                 | 47                           | 93.0                                          | 0.81                 |
| No                          | 768                                    | 574                                          | 73.5                                          |                      | 723                          | 94.4                                          |                      |

Abbreviations: CVD, cardiovascular disease; GED, participant passed the General Educational Development tests certifying they have American high school-level academic skills. NHANES, National Health and Nutrition Examination Survey.

<sup>a</sup> Non-pregnant participants aged 20-69 years in NHANES 2014 who completed an initial 24-h urine collection whose ratio of observed-to-expected 24-hour urinary creatinine excretion was 0.7 or more. Expected 24-hour urinary creatinine excretion based on two different criteria.

<sup>b</sup> See "Methods" for definitions of participant characteristics and groups.

<sup>c</sup> Unweighted number. Excludes 6 participants with missing data on weight, height, or for whom expected urinary creatinine excretion could not be computed. No. in subgroups may not add to totals due to missing values.

<sup>d</sup> Joossens and Geboers's criteria<sup>10</sup> for estimated (expected) 24-hour urinary creatinine excretion: Expected 24-hour creatinine excretion (mg/day) = G × body weight (kg), G = 21 for females and 24 for males.

<sup>e</sup> Mage's criteria<sup>11</sup> for estimated (expected) 24-hour urinary creatinine excretion: For males: Expected 24-hour creatinine (mg/day) = 0.00179 × [140 – Age (years)] × [Weight (kg)<sup>1.5</sup> × Height (cm)<sup>0.5</sup>] × [1 + 0.18 × (Black=1, non-Black=0)] × [1.366 – 0.0159 BMI (kg/m<sup>2</sup>)]. For females: Expected 24-hour creatinine (mg/day) = 0.00163 × [140 – Age (years)] × [Weight (kg)<sup>1.5</sup> × Height (cm)<sup>0.5</sup>] × [1 + 0.18 × (Black=1, non-Black=0)] × [1.429 – 0.0198 BMI (kg/m<sup>2</sup>)].

<sup>f</sup> Unweighted number of participants with >70% of expected 24-hour urinary creatinine excretion.

<sup>g</sup> Weighted percent of total participants with >70% of expected 24-hour urinary creatinine excretion.

<sup>h</sup> P value for Rao-Scott F-adjusted chi-square test.

<sup>i</sup> P value could not be computed as one cell included 100% of total participants.

| <b>eTable 14. Weighted Mean Urinary Electrolyte Excretion, Adults With &gt;70% of Expected Creatinine Excretion<sup>a</sup></b> |                                                        |                                                           |                                                        |                                                           |
|---------------------------------------------------------------------------------------------------------------------------------|--------------------------------------------------------|-----------------------------------------------------------|--------------------------------------------------------|-----------------------------------------------------------|
| <b>Participant subgroup<sup>b</sup></b>                                                                                         | <b>Joossens and Geboers's criteria<sup>c</sup></b>     |                                                           | <b>Mage's criteria<sup>d</sup></b>                     |                                                           |
|                                                                                                                                 | <b>Mean 24-h urinary sodium excretion (95% CI), mg</b> | <b>Mean 24-h urinary potassium excretion (95% CI), mg</b> | <b>Mean 24-h urinary sodium excretion (95% CI), mg</b> | <b>Mean 24-h urinary potassium excretion (95% CI), mg</b> |
| Total                                                                                                                           | 3879 (3637-4121)                                       | 2305 (2162-2448)                                          | 3688 (3461-3915)                                       | 2229 (2099-2359)                                          |
| Sex                                                                                                                             |                                                        |                                                           |                                                        |                                                           |
| Male                                                                                                                            | 4406 (4063-4749)                                       | 2510 (2324-2696)                                          | 4334 (4012-4655)                                       | 2504 (2352-2656)                                          |
| Female                                                                                                                          | 3126 (2952-3301)                                       | 2013 (1853-2173)                                          | 3071 (2865-3276)                                       | 1966 (1792-2141)                                          |
| <i>P</i> Value <sup>e</sup>                                                                                                     | <.001                                                  | <.001                                                     | <.001                                                  | <.001                                                     |
| Age, years                                                                                                                      |                                                        |                                                           |                                                        |                                                           |
| 20-44                                                                                                                           | 3891 (3603-4179)                                       | 2142 (2035-2249)                                          | 3829 (3530-4128)                                       | 2070 (1959-2181)                                          |
| 45-69                                                                                                                           | 3862 (3515-4210)                                       | 2531 (2326-2735)                                          | 3537 (3266-3809)                                       | 2399 (2203-2595)                                          |
| <i>P</i> Value <sup>e</sup>                                                                                                     | 0.88                                                   | 0.001                                                     | 0.10                                                   | 0.005                                                     |
| Race and Hispanic origin                                                                                                        |                                                        |                                                           |                                                        |                                                           |
| Non-Hispanic white                                                                                                              | 3893 (3574-4212)                                       | 2455 (2265-2646)                                          | 3669 (3370-3968)                                       | 2360 (2218-2501)                                          |
| Non-Hispanic black                                                                                                              | 3820 (3565-4075)                                       | 1846 (1704-1988)                                          | 3714 (3423-4005)                                       | 1818 (1669-1968)                                          |
| Non-Hispanic Asian                                                                                                              | 3747 (3276-4218)                                       | 2097 (1783-2410)                                          | 3666 (3210-4122)                                       | 2098 (1813-2384)                                          |
| Hispanic                                                                                                                        | 3915 (3513-4317)                                       | 2190 (2023-2357)                                          | 3772 (3307-4236)                                       | 2113 (1926-2299)                                          |
| <i>P</i> Value <sup>e</sup>                                                                                                     |                                                        |                                                           |                                                        |                                                           |
| Non-Hispanic white vs. non-Hispanic black                                                                                       | 0.73                                                   | <.001                                                     | 0.83                                                   | <.001                                                     |
| Non-Hispanic white vs. non-Hispanic Asian                                                                                       | 0.63                                                   | 0.02                                                      | 0.99                                                   | 0.04                                                      |
| Non-Hispanic white vs. Hispanic                                                                                                 | 0.92                                                   | 0.07                                                      | 0.68                                                   | 0.04                                                      |
| Non-Hispanic black vs. non-Hispanic Asian                                                                                       | 0.75                                                   | 0.07                                                      | 0.84                                                   | 0.03                                                      |
| Non-Hispanic black vs. Hispanic                                                                                                 | 0.56                                                   | 0.006                                                     | 0.77                                                   | 0.02                                                      |
| Non-Hispanic Asian vs. Hispanic                                                                                                 | 0.49                                                   | 0.62                                                      | 0.67                                                   | 0.93                                                      |

Abbreviations: CI, confidence intervals.

SI conversion factors: To convert electrolyte values to mmol, divide the sodium value by 23 and the potassium value by 39.

<sup>a</sup>Weighted mean, and 95% CI were estimated from the initial 24-hour urine collection. Sample size (n) are available in eTable 13 in this document. The subsamples of participants were identified as having observed 24-h urinary creatinine excretion greater than 70% of that expected based on weight, sex, and other characteristics (see footnote c and d below).

<sup>b</sup>See "Methods" for definitions of participant characteristics and groups.

<sup>c</sup>Joossens and Geboers's criteria<sup>10</sup> for estimated (expected) 24-hour urinary creatinine excretion: Expected 24-hour creatinine excretion (mg/day) = G × body weight (kg), G = 21 for females and 24 for males.

<sup>d</sup>Mage's criteria<sup>11</sup> for estimated (expected) 24-hour urinary creatinine excretion: For males: estimated 24-hour creatinine (mg/day) = 0.00179 \* [140 – Age (years)] \* [Weight (kg)<sup>1.5</sup> \* Height (cm)<sup>0.5</sup>] \* [1 + 0.18 \* (Black=1, non-Black=0)] \* [1.366 – 0.0159 BMI (kg/m<sup>2</sup>)]. For females: estimated 24-hour creatinine (mg/day) = 0.00163 \* [140 – Age (years)] \* [Weight (kg)<sup>1.5</sup> \* Height (cm)<sup>0.5</sup>] \* [1 + 0.18 \* (Black=1, non-Black=0)] \* [1.429 – 0.0198 BMI (kg/m<sup>2</sup>)]

<sup>e</sup>*P* values, two-tailed t-test, comparing weighted mean 24-hour urinary sodium or potassium excretion between subgroups for the specified participant characteristic. When a participant characteristic included more than two subgroups, the comparison was indicated.

| Group                                               | With multiple imputation <sup>a</sup> |                                                                 |                                                                    | Without multiple imputation <sup>b</sup> |                                                                  |                                                                    |
|-----------------------------------------------------|---------------------------------------|-----------------------------------------------------------------|--------------------------------------------------------------------|------------------------------------------|------------------------------------------------------------------|--------------------------------------------------------------------|
|                                                     | Weighted % of participants            | 24-hour urinary sodium excretion Mean (95% CI), mg <sup>c</sup> | 24-hour urinary potassium excretion Mean (95% CI), mg <sup>c</sup> | Weighted % of participants               | 24-hour urinary sodium excretion, Mean (95% CI), mg <sup>c</sup> | 24-hour urinary potassium excretion Mean (95% CI), mg <sup>c</sup> |
| Family income, % federal poverty index <sup>d</sup> |                                       |                                                                 |                                                                    |                                          |                                                                  |                                                                    |
| <130%                                               | 28.0                                  | 3471 (3206-3736)                                                | 1799 (1678-1921)                                                   | 27.9                                     | 3475 (3207-3742)                                                 | 1799 (1681-1916)                                                   |
| >130%                                               | 72.0                                  | 3662 (3405-3919)                                                | 2292 (2159-2426)                                                   | 72.1                                     | 3681 (3440-3922)                                                 | 2301 (2162-2440)                                                   |
| Chronic kidney disease <sup>e</sup>                 |                                       |                                                                 |                                                                    |                                          |                                                                  |                                                                    |
| Yes                                                 | 11.3                                  | 3506 (3223-3789)                                                | 2112 (1750-2475)                                                   | 11.2                                     | 3527 (3250-3804)                                                 | 2128 (1765-2490)                                                   |
| No                                                  | 88.7                                  | 3622 (3416-3828)                                                | 2160 (2028-2292)                                                   | 88.8                                     | 3620 (3417-3820)                                                 | 2167 (2031-2302)                                                   |

Abbreviations: CI, confidence interval.

SI conversion factors: To convert electrolyte values to mmol, divide the sodium value by 23 and the potassium value by 39.

<sup>a</sup> Multiple imputation was used to classify adults with missing information on family income (6.0% missing, n=50) and chronic kidney disease (3.5% missing, n=29).

<sup>b</sup> Adults with missing information on the designated participant characteristic were excluded from analysis.

<sup>c</sup> Weighted means and confidence intervals for 24-hour urinary sodium and potassium excretion were estimated from the initial 24-hour urine collection for non-pregnant adults, aged 20-69 years. Values account for complex survey design, sampling and non-response using sample weights for the 24 h urine collection in the 2014 National Health and Nutrition Examination Survey.

<sup>d</sup> Total family income relative to the Department of Health and Human Services poverty guidelines for 2014.

<sup>e</sup> Chronic kidney disease defined as an estimated glomerular filtration (eGfr) rate <60 mL/min/1.73 m<sup>2</sup> or urinary albumin/creatinine ratio > 30 mg/g.

**eTable 16. Weighted Mean 24-Hour Urinary Electrolyte Excretion by Hypertension Status, US Adults, 2014<sup>a</sup>**

| Total sample                     | No. (% [95% CI]) <sup>b</sup> | Sodium, mg       | Potassium, mg    | Molar ratio, Na:K |
|----------------------------------|-------------------------------|------------------|------------------|-------------------|
| Hypertension                     | 258 (29.0 [22.3-35.8])        | 3845 (3527-4163) | 2179 (2029-2329) | 3.26 (2.83-3.68)  |
| Prehypertension                  | 193 (23.2 [19.5-26.9])        | 3606 (3370-3842) | 2264 (2069-2458) | 3.01 (2.71-3.31)  |
| Normotension                     | 360 (47.8 [41.8-53.7])        | 3416 (3170-3662) | 2084 (1917-2251) | 3.15 (2.82-3.49)  |
| <i>P</i> Value <sup>c</sup>      |                               |                  |                  |                   |
| Hypertension vs. prehypertension | NA                            | 0.17             | 0.38             | 0.27              |
| Hypertension vs. normotension    | NA                            | 0.054            | 0.33             | 0.65              |
| Prehypertension vs. normotension | NA                            | 0.21             | 0.04             | 0.40              |
| Men                              |                               |                  |                  |                   |
| Hypertension                     | 130 (29.1 [20.4-37.8])        | 4707 (4153-5262) | 2418 (2178-2658) | 3.69 (3.07-4.31)  |
| Prehypertension                  | 124 (29.0 [20.4-37.5])        | 4092 (3768-4417) | 2411 (2175-2646) | 3.21 (2.81-3.60)  |
| Normotension                     | 157 (41.9 [34.5-49.4])        | 3852 (3492-4213) | 2369 (2128-2610) | 3.11 (2.64-3.57)  |
| <i>P</i> Value <sup>c</sup>      |                               |                  |                  |                   |
| Hypertension vs. prehypertension | NA                            | 0.07             | 0.97             | 0.19              |
| Hypertension vs. normotension    | NA                            | 0.03             | 0.65             | 0.08              |
| Prehypertension vs. normotension | NA                            | 0.33             | 0.79             | 0.71              |
| Women                            |                               |                  |                  |                   |
| Hypertension                     | 128 (28.9 [21.3-36.5])        | 3026 (2623-3429) | 1953 (1714-2192) | 2.84 (2.38-3.31)  |
| Prehypertension                  | 69 (17.8 [12.5-23.1])         | 2859 (2593-3125) | 2038 (1664-2413) | 2.72 (2.34-3.10)  |
| Normotension                     | 203 (53.3[46.6-59.9])         | 3093 (2880-3306) | 1873 (1669-2076) | 3.19 (2.85-3.53)  |
| <i>P</i> Value <sup>c</sup>      |                               |                  |                  |                   |
| Hypertension vs. prehypertension | NA                            | 0.39             | 0.64             | 0.60              |
| Hypertension vs. normotension    | NA                            | 0.74             | 0.57             | 0.18              |
| Prehypertension vs. normotension | NA                            | 0.18             | 0.39             | 0.04              |

Abbreviations: CI, confidence interval; K, potassium; Na, sodium; NA, not applicable; NHANES, National Health and Nutrition Examination Survey, vs., versus.

SI conversion factors: To convert electrolyte values to mmol, divide the sodium value by 23 and the potassium value by 39.

<sup>a</sup> Weighted means and 95% confidence intervals of 24-hour urinary electrolyte excretions were estimated from the initial 24-hour urine collection for non-pregnant adults aged 20-69 years in NHANES 2014. Hypertension status was defined according to previous national surveillance criteria, as mean SBP  $\geq$ 140 mm Hg, mean DBP  $\geq$ 90 mm Hg, or self-reported use of antihypertensive medication. Pre-hypertension was defined as a mean SBP of 120–139 mm Hg or a mean DBP of 80–89 mm Hg among those without hypertension.

Normotension was defined as mean SBP <120 mm Hg and mean DBP <80 mm Hg in the absence of antihypertensive medication.

<sup>b</sup> Unweighted sample size, weighted percent.

<sup>c</sup> Two-tailed t-test, comparing mean 24-hour urinary electrolyte excretion between subgroups as specified.



| <b>eTable 17. Weighted Mean Dietary Sodium, Energy, and Sodium Density, NHANES 2013-2014<sup>a</sup></b> |                        |                                          |                                          |                                                                |
|----------------------------------------------------------------------------------------------------------|------------------------|------------------------------------------|------------------------------------------|----------------------------------------------------------------|
|                                                                                                          | <b>No.<sup>b</sup></b> | <b>Sodium, Mean (95% CI),<br/>mg/day</b> | <b>Energy, Mean (95% CI),<br/>kcal/d</b> | <b>Sodium density, Mean (95% CI),<br/>mg sodium/1000 kcal,</b> |
| Both sexes                                                                                               | 4246                   | 3607 (3541-3672)                         | 2189 (2148-2231)                         | 1699 (1670-1729)                                               |
| Men                                                                                                      | 2056                   | 4175 (4061-4290)                         | 2533 (2479-2586)                         | 1696 (1668-1723)                                               |
| Women                                                                                                    | 2190                   | 3044 (2994-3094)                         | 1849 (1805-1893)                         | 1703 (1653-1754)                                               |
| P-value, two-tailed t-test,<br>comparing mean intake,<br>men vs. women                                   |                        | <.001                                    | <.001                                    | 0.78                                                           |

Abbreviations: CI, confidence interval; NHANES, National Health and Nutrition Examination Survey.

SI conversion factors: To convert sodium values to mmol, divide the sodium value by 23.

<sup>a</sup> Weighted mean and 95% CI for dietary sodium and energy intake and their ratio (sodium density) were estimated from the initial 24-hour dietary recall in NHANES 2013-2014 for non-pregnant adults aged 20-69 years who participated in the examination component and completed an initial, reliable, 24-hour dietary recall.

<sup>b</sup> Unweighted sample size.

**eFigure 1. Weighted Mean 24-Hour Urinary Sodium Excretion by Age Group, NHANES 2014**

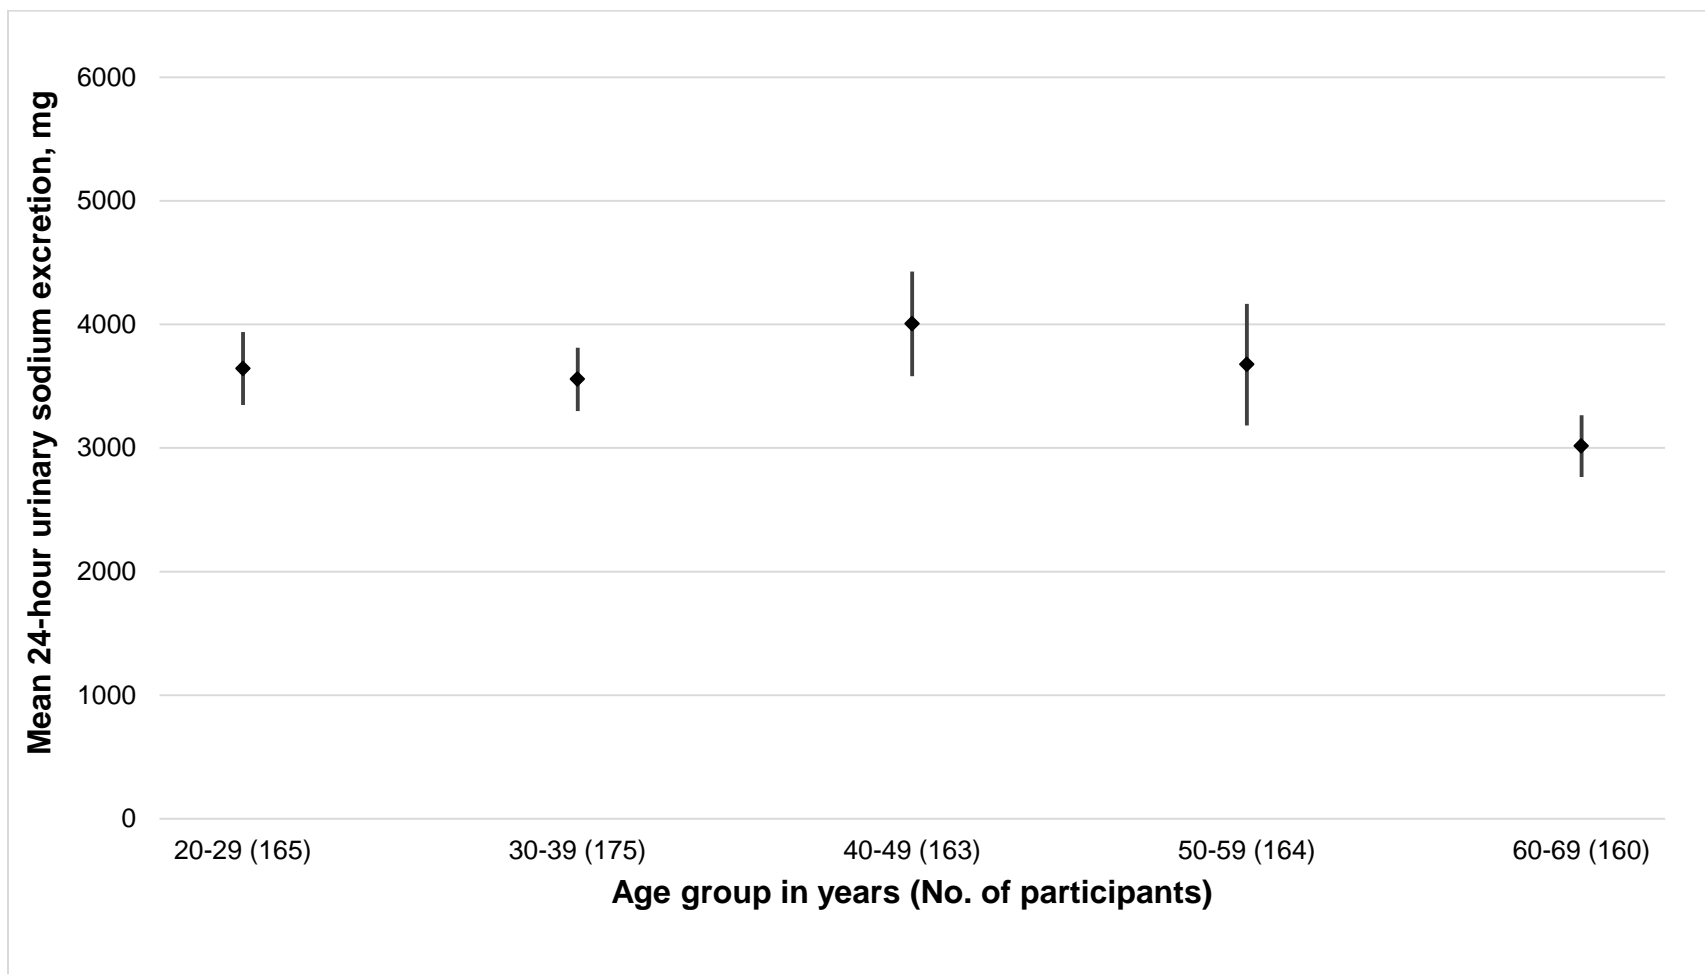

**eFigure 2. Weighted Mean 24-Hour Urinary Sodium Excretion by Age Group and Sex, NHANES 2014**

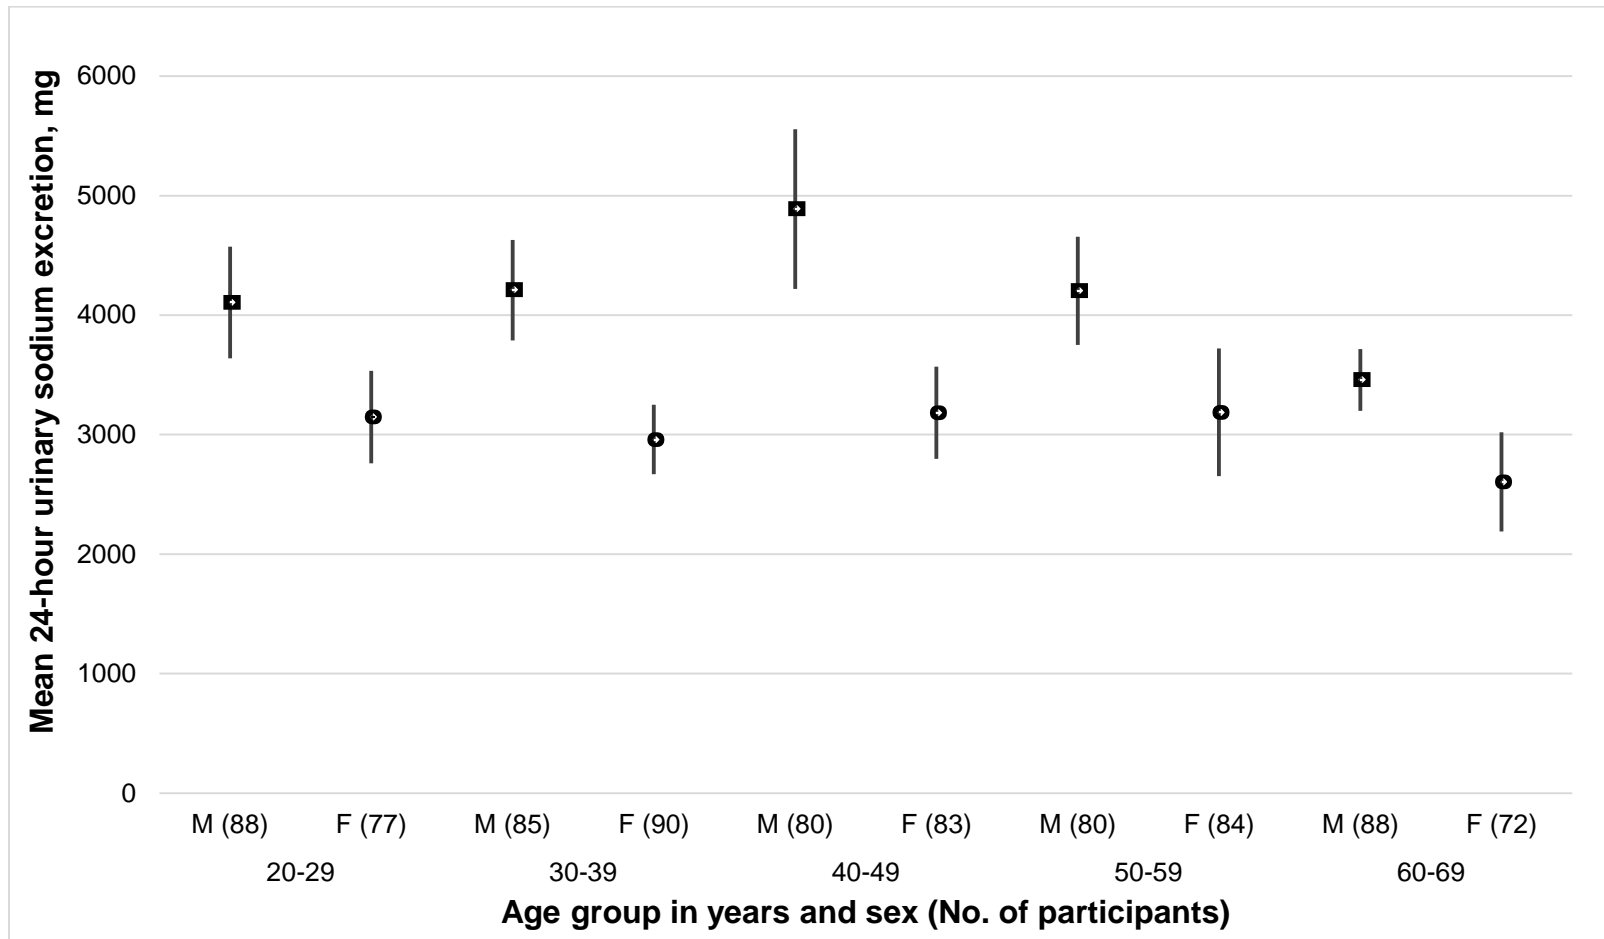

## **eFigure Legends.**

### **eFigure1. Weighted Mean 24-Hour Urinary Sodium Excretion by 10-Year Age Group, NHANES 2014.**

Abbreviations: CI, confidence interval; NHANES, National Health and Nutrition Examination Survey. SI conversion factors: To convert sodium values to mmol, divide 23. The weighted means (diamonds) are shown with the bars representing 95% CI. Unweighted sample size are shown in parentheses for each group.

### **eFigure2. Weighted Mean 24-Hour Urinary Sodium Excretion by 10-Year Age Group and Sex, NHANES, 2014.**

Abbreviations: CI, confidence interval; F, Female; M, Male; NHANES, National Health and Nutrition Examination Survey. SI conversion factors: To convert sodium values to mmol, divide by 23. The weighted means for men (squares) and for women (circles) are shown with the bars representing 95% CI. Unweighted sample size are shown in parentheses for each group.

## eReferences.

- 1) National Center for Health Statistics, Centers for Disease Control and Prevention (CDC). National Health and Nutrition Examination Survey. 24-hour urine study procedures manual. [https://www.cdc.gov/nchs/data/nhanes/2013-2014/manuals/24\\_Hour\\_Urine\\_Study\\_Procedures\\_Manual.pdf](https://www.cdc.gov/nchs/data/nhanes/2013-2014/manuals/24_Hour_Urine_Study_Procedures_Manual.pdf). Published January, 2014. Accessed May 1, 2017.
- 2) National Center for Health Statistics, Centers for Disease Control and Prevention (CDC). National Health and Nutrition Examination Survey. 2014-2014 Data documentation, codebook, and frequencies. 24-hour urine collection data process- second collection (UR2\_H\_R). [https://www.cdc.gov/Nchs/Nhanes/limited\\_access/UR2\\_H\\_R.htm](https://www.cdc.gov/Nchs/Nhanes/limited_access/UR2_H_R.htm). Published March 2016. Accessed May 1, 2017.
- 3) Centers for Disease Control and Prevention (CDC). National Center for Health Statistics. National Health and Nutrition Examination Survey. 2013-2014 Data Documentation, Codebook, and Frequencies. Body Measures (BMX\_H). [https://www.cdc.gov/Nchs/Nhanes/2013-2014/BMX\\_H.htm](https://www.cdc.gov/Nchs/Nhanes/2013-2014/BMX_H.htm). Published October 2015. Accessed May 5, 2017.
- 4) Centers for Disease Control and Prevention (CDC). National Center for Health Statistics. National Health and Nutrition Examination Survey. 2013-2014 Data Documentation, Codebook, and Frequencies. Physical Activity (PAQ\_H). March 2017. [https://www.cdc.gov/Nchs/Nhanes/2013-2014/PAQ\\_H.htm](https://www.cdc.gov/Nchs/Nhanes/2013-2014/PAQ_H.htm). Published March 2017. Accessed May 5, 2017.
- 5) Yang Q, Cogswell ME, Flanders WD, Hong Y, Zhang Z, Loustalot F. Trends in cardiovascular health metrics and associations with all-cause and CVD mortality among US adults. *JAMA*. 2012;307(12):1273-83.
- 6) Whelton PK, Carey RM, Aronow WS, et al. 2017 ACC/AHA/AAPA/ABC/ACPM/AGS/APhA/ASH/ASPC/NMA/PCNA Guideline for the Prevention, Detection, Evaluation, and Management of High Blood Pressure in Adults. A Report of the American College of Cardiology/American Heart Association Task Force on Clinical Practice Guidelines [published online November 13, 2017]. *Hypertension*. doi:10.1161/HYP.000000000000065.
- 7) Crim MT, Yoon SS, Ortiz E, et al. National surveillance definitions for hypertension prevalence and control among adults. *Circ Cardiovasc Qual Outcomes*. 2012;5(3):343-51
- 8) John KA, Cogswell ME, Campbell NR, et al. Accuracy and usefulness of select methods for assessing complete collection of 24-hour urine: a systematic review. *J Clin Hypertens (Greenwich)*. 2016;18(5):1-12.
- 9) Cogswell ME, Maalouf J, Elliott P, Loria CM, Patel S, Bowman BA. Use of urine biomarker to assess sodium intake: Challenges and opportunities. *Ann Rev Nutr*. 2015;35:349-387.
- 10) Joossens JV, Geboers J. Monitoring salt intake of the population: methodological considerations. In De Backer HvGG, Pedoe HT, Ducimetiere P, ed. Surveillance of the dietary habits of the population with regard to cardiovascular diseases, EURO Nut Report 2. Wageningen: Department of Human Nutrition, Agricultural University, 1984;61-73.
- 11) Mage DT, Allen RH, and Kodali A. Creatinine corrections for estimating children's and adult's pesticide intake doses in equilibrium with urinary pesticide and creatinine concentrations. *J Expo Anal Environ Epidemiol*. 2008;18(4):360-8.
- 12) Berglund PA, Multiple imputation using the fully condition specification method: a comparison of SAS, Stata, IVEware, and R. <https://support.sas.com/resources/papers/proceedings15/2081-2015.pdf>. University of Michigan – Institute for Social Research. Paper 2081-2015. Published 2015. Accessed January 1, 2018.
- 13) Liu K, Cooper R, Soltero I, Stamler J. Variability in 24-hour urine sodium excretion in children. *Hypertension*. 1979;1(6):631-636.
